# Supplementary material
Source: PubMed Central journal article supplement (PMC8102312)

**Formaldehyde and brain disorders: A meta-analysis and bioinformatics approach: Supplement**

Iemaan Rana<sup>1</sup>, Linda Rieswijk<sup>1,2</sup>, Craig Steinmaus<sup>3</sup>, Luoping Zhang<sup>1\*</sup>

<sup>1</sup> Division of Environmental Health Sciences, School of Public Health, University of California, Berkeley, CA, United States.

<sup>2</sup> Institute of Data Science, Maastricht University, Maastricht, Netherlands.

<sup>3</sup> Division of Epidemiology and Biostatistics, School of Public Health, University of California Berkeley, Berkeley, CA, United States.

**\*Corresponding Author:**

Luoping Zhang, PhD  
Division of Environmental Health Sciences  
School of Public Health  
2121 Berkeley Way West, #5117  
Berkeley, CA 94720-7360  
Tel: (510) 643-5189  
Fax: (510) 642-0427  
Email: [luoping@berkeley.edu](mailto:luoping@berkeley.edu)

## Table of Contents

|                                                            |    |
|------------------------------------------------------------|----|
| A1. Search strategy and inclusion/exclusion criteria ..... | 2  |
| A1.1 ALS search terms .....                                | 3  |
| A1.2 PD search terms .....                                 | 3  |
| A1.3 Brain tumor search terms .....                        | 5  |
| A1.4 AD search terms .....                                 | 4  |
| A1.5 MS search terms.....                                  | 4  |
| A2. Quality analysis results .....                         | 5  |
| A3. Bioinformatics methods.....                            | 5  |
| A3.1 Gene-association data from CTD .....                  | 5  |
| A3.2 Inference of common biomarker genes .....             | 6  |
| A3.3 Gene enrichment analysis .....                        | 6  |
| Supplementary Tables                                       |    |
| Supplementary Table 1. ....                                | 7  |
| Supplementary Table 2. ....                                | 8  |
| Supplementary Table 3. ....                                | 9  |
| Supplementary Table 4. ....                                | 10 |
| Supplementary Table 5. ....                                | 11 |
| Supplementary Table 6. ....                                | 13 |
| Supplementary Table 7. ....                                | 17 |
| Supplementary Table 8. ....                                | 29 |
| Supplementary Figures                                      |    |
| Supplementary Figure 1. ....                               | 30 |
| Supplementary Figure 2. ....                               | 31 |
| Supplementary Figure 3. ....                               | 32 |

### A1. Search strategy and inclusion/exclusion criteria

We performed electronic searches of online databases (PubMed, Web of Science Core Collection, Biosis Previews, Embase, Google Scholar, Toxline/DART, Chinese National Knowledge Infrastructure (CNKI), Wanfang Data, and Chongqing VIP Information (CQVIP)) using search terms outlined below. Search terms were developed using the Medical Subject Headings (MeSH) database to compile synonyms for formaldehyde and outcomes related to NDD and brain cancer. Searches included all human (cohort and case-control) studies of formaldehyde and NDD or BT. Only data published in peer-reviewed journals or edited books were eligible for inclusion. No language restrictions were applied.

Studies were excluded if they did not include estimates of relative risk and variance or the data needed to calculate them, they had no cases of disease, lacked a clearly exposed group, reported data on the same cohort as another publication used in the meta-analysis (in which case the most recent analysis was selected), or were not published in a scientific journal/official reports. We analyzed population-based studies with no known high exposure source and studies that reported standardized proportionate incidence ratios (SPIR) only in sensitivity analyses, but not in the main meta-analysis. SPIR was excluded because formaldehyde is known to cause other leukemia and nasopharyngeal cancer, meaning the SPIR would bias the

relative risk estimates towards the null. The effect of these exclusions has been evaluated in the sensitivity analysis ([Section 3.2.3](#)).

### **A1.1 ALS search terms**

("Formaldehyde"[Mesh] OR 50-00-0[RN] OR Formaldehyde[tiab] OR cadaver[tiab] OR embalm\*[tiab] OR garment-workers[tiab] OR textile-workers[tiab] OR housing[tiab] OR "housing"[Mesh] OR Travel-trailer\*[tiab] OR manufactured-home\*[tiab] OR mobile-home\*[tiab] OR manufactured-hous\*[tiab] OR modular-home\*[tiab]) OR "temporary housing unit"[tiab] OR "temporary housing units"[tiab] OR cadaver[tiab] OR embalm\*[tiab] OR garment-workers[tiab] OR textile-workers[tiab] OR wood-workers[tiab] OR woodworkers[tiab] OR Construction workers[tiab]) AND Sclerosis, Amyotrophic Lateral OR Charcot Disease OR Motor Neuron Disease, Amyotrophic Lateral Sclerosis OR Lou Gehrig Disease OR Lou Gehrig's Disease OR Lou-Gehrigs Disease Disease, Lou-Gehrigs OR ALS (Amyotrophic Lateral Sclerosis) OR Gehrig's Disease OR Gehrig Disease OR Gehrings Disease OR Amyotrophic Lateral Sclerosis, Guam Form OR Amyotrophic Lateral Sclerosis, Parkinsonism-Dementia Complex of Guam OR Amyotrophic Lateral Sclerosis, Parkinsonism Dementia Complex of Guam OR Guam Form of Amyotrophic Lateral Sclerosis OR Amyotrophic Lateral Sclerosis-Parkinsonism-Dementia Complex 1 OR Amyotrophic Lateral Sclerosis Parkinsonism Dementia Complex 1 OR Guam Disease OR Disease, Guam OR Amyotrophic Lateral Sclerosis With Dementia OR Dementia With Amyotrophic Lateral Sclerosis

**Performed on 7/23/2018 n = 39**

**Updated on 5/29/2019 n=2 (both excluded)**

### **A1.2 PD search terms**

Parkinsonian Syndrome OR Parkinsonism OR Parkinsonian Syndromes OR Parkinsonian Diseases OR Autosomal Dominant Parkinsonism OR Dominant Parkinsonism, Autosomal OR Parkinsonism, Autosomal Dominant OR Autosomal Recessive Juvenile Parkinson Disease OR Chromosome 6-Linked Autosomal Recessive Parkinsonism OR Chromosome 6 Linked Autosomal Recessive Parkinsonism OR Familial Parkinson Disease, Autosomal Recessive OR Juvenile Parkinson Disease, Autosomal Recessive OR Juvenile Parkinsonism, Autosomal Recessive OR Parkinsonism, Early Onset, with Diurnal Fluctuation OR Parkinsonism, Juvenile, Autosomal Recessive OR Parkinson Disease 2, Autosomal Recessive Juvenile OR Parkinsonism, Early-Onset, With Diurnal Fluctuation OR Parkinson Disease, Juvenile, Autosomal Recessive OR Parkinson Disease 2 OR Parkinson Disease Autosomal Recessive, Early Onset OR Autosomal Recessive Juvenile Parkinsonism OR Parkinson Disease, Familial, Autosomal Recessive OR Ramsay Hunt Paralysis Syndrome OR Familial Juvenile Parkinsonism OR Juvenile Parkinsonism, Familial OR Parkinsonism, Familial Juvenile OR Parkinsonism, Experimental OR Experimental Parkinsonisms OR Parkinsonisms, Experimental OR Parkinson Disease, Experimental OR Experimental Parkinsonism, MPTP-Induced OR Experimental Parkinsonism, MPTP Induced OR Parkinsonism, MPTP-Induced Experimental OR MPTP-Induced Experimental Parkinsonism OR MPTP Induced Experimental Parkinsonism OR Experimental Parkinson Disease OR Diseases, Experimental Parkinson OR Experimental Parkinson Diseases OR Parkinson Diseases, Experimental OR Experimental Parkinsonism OR Parkinsonism, Juvenile OR Juvenile Parkinsonism OR Juvenile Parkinsonisms OR Parkinsonisms, Juvenile OR Parkinson Disease, Juvenile OR Juvenile Parkinson Disease OR Autosomal Dominant Juvenile Parkinson Disease OR Juvenile Parkinson Disease, Autosomal Dominant OR Parkinsonism, Juvenile, Autosomal Dominant OR Parkinson Disease, Autosomal

Dominant. Juvenile OR Parkinson Disease, Juvenile, Autosomal Dominant OR Autosomal Dominant Juvenile Parkinsonism OR Juvenile Parkinsonism, Autosomal Dominant OR Autosomal Recessive Parkinsonism OR Parkinsonism, Autosomal Recessive OR Recessive Parkinsonism, Autosomal OR Parkinson Disease

**Performed on 7/23/18 n = 66**

**Updated on 5/29/2019 n=2 (one excluded because it used mean differences, other one did not have FA)**

### ***A1.3 AD search terms***

Alzheimer's Disease OR Dementia, Senile OR Senile Dementia OR Dementia, Alzheimer Type OR Alzheimer Type Dementia OR Alzheimer-Type Dementia (ATD) OR Alzheimer Type Dementia (ATD) OR Dementia, Alzheimer-Type (ATD) OR Alzheimer Type Senile Dementia OR Primary Senile Degenerative Dementia OR Dementia, Primary Senile Degenerative OR Alzheimer Sclerosis OR Sclerosis, Alzheimer OR Alzheimer Syndrome OR Alzheimer Dementia OR Alzheimer Dementias OR Dementia, Alzheimer OR Dementias, Alzheimer OR Senile Dementia, Alzheimer Type OR Acute Confusional Senile Dementia OR Senile Dementia, Acute Confusional OR Dementia, Presenile OR Presenile Dementia OR Alzheimer Disease, Late Onset OR Late Onset Alzheimer Disease OR Alzheimer's Disease, Focal Onset OR Focal Onset Alzheimer's Disease OR Familial Alzheimer Disease (FAD) OR Alzheimer Disease, Familial (FAD) OR Alzheimer Diseases, Familial (FAD) OR Familial Alzheimer Diseases (FAD) OR Alzheimer Disease, Early Onset OR Early Onset Alzheimer Disease OR Presenile Alzheimer Dementia

**Performed on 7/23/18 n = 199**

**Updated on 5/29/2019 n=10**

### ***A1.4 MS search terms***

Sclerosis, Multiple OR Sclerosis, Disseminated OR Disseminated Sclerosis OR MS (Multiple Sclerosis) OR Multiple Sclerosis, Acute Fulminating OR Demyelinating Autoimmune Disorders, CNS OR Demyelinating Disease, Autoimmune, CNS OR CNS Demyelinating Autoimmune Diseases OR Autoimmune Demyelinating Diseases, CNS OR Autoimmune Demyelinating Disorders, CNS OR CNS Autoimmune Demyelinating Disorders OR Demyelinating Autoimmune Diseases, Central Nervous System OR Autoimmune Demyelinating Diseases, Central Nervous System OR Autoimmune Diseases, Demyelinating, Brain OR Demyelinating Autoimmune Diseases, Brain OR Brain Autoimmune Demyelinating Diseases OR Spinal Cord Demyelinating Autoimmune Diseases OR Autoimmune Demyelinating Diseases, Spinal Cord OR Demyelinating Autoimmune Diseases, Spinal Cord OR Autoimmune Demyelinating Diseases, Cerebral OR Demyelinating Autoimmune Diseases, Cerebral OR Cerebral Demyelinating Diseases, Autoimmune

**Performed on 7/23/18 n = 74**

**Updated on 5/29/2019 n=2**

### **A1.5 Brain tumor search terms**

((“Brain Neoplasms”[Mesh] OR “Nervous System Neoplasms”[Mesh] OR “Central Nervous System Neoplasms”[Mesh] OR Neoplasms, Brain[tiab] OR Neoplasm, Brain[tiab] OR Brain Tumors[tiab] OR Brain Tumor[tiab] OR Tumor, Brain[tiab] OR Tumors, Brain[tiab] OR Brain Cancer[tiab] OR Brain Cancers[tiab] OR Cancer, Brain[tiab] OR Cancers, Brain[tiab] OR Malignant Neoplasms, Brain[tiab] OR Brain Malignant Neoplasm[tiab] OR Brain Malignant Neoplasms[tiab] OR Malignant Neoplasm, Brain[tiab] OR Cancer of Brain[tiab] OR Cancer of the Brain[tiab] OR Neoplasms, Brain, Malignant[tiab] OR Brain Neoplasms, Malignant[tiab] OR Brain Neoplasm, Malignant[tiab] OR Malignant Brain Neoplasm[tiab] OR Malignant Brain Neoplasms[tiab] OR Neoplasms, Intracranial[tiab] OR Intracranial Neoplasm[tiab] OR Neoplasm, Intracranial[tiab] OR Intracranial Neoplasms[tiab] OR Brain Tumor, Recurrent[tiab] OR Brain Tumors, Recurrent[tiab] OR Recurrent Brain Tumor[tiab] OR Recurrent Brain Tumors[tiab] OR Malignant Primary Brain Tumors[tiab] OR Primary Malignant Brain Tumors[tiab] OR Malignant Primary Brain Neoplasms[tiab] OR Primary Malignant Brain Neoplasms[tiab] OR Brain Neoplasms, Malignant, Primary[tiab] OR Brain Neoplasms, Primary Malignant[tiab] OR Benign Neoplasms, Brain[tiab] OR Benign Neoplasm, Brain[tiab] OR Brain Benign Neoplasm[tiab] OR Brain Benign Neoplasms[tiab] OR Neoplasms, Brain, Benign[tiab] OR Brain Neoplasms, Benign[tiab] OR Benign Brain Neoplasm[tiab] OR Benign Brain Neoplasms[tiab] OR Brain Neoplasm, Benign[tiab] OR Brain Tumor, Primary[tiab] OR Brain Tumors, Primary[tiab] OR Primary Brain Tumor[tiab] OR Primary Brain Tumors[tiab] OR Neoplasms, Brain, Primary[tiab] OR Brain Neoplasm, Primary[tiab] OR Brain Neoplasms, Primary[tiab] OR Primary Brain Neoplasm[tiab] OR Primary Brain Neoplasms[tiab]))

**Performed on 11/18/2017 n=1180**

**Updated on 5/29/2019 n=8**

### **A2. Quality analysis results**

Among the ALS studies, Pinkerton et al. (2013) and Roberts et al. (2016) were ranked as the highest quality cohort studies, and Fang et al. (2009) was the highest quality case-control study. Among the brain tumor studies, the highest quality cohort studies were Beane Freeman et al. (2013), Jiang et al. (1990), and Meyers et al. (2013); the highest quality case-control study of brain tumors was Coggon et al. (2014).

### **A3. Bioinformatics methods**

#### **A3.1 Gene-association data from CTD**

The CTD is a large and publicly available resource that contains manually curated data for published chemical-gene and gene-disease interactions (it contained > 38 million relationships as of August 2018). We applied appropriate Medical Subject Heading (MeSH) search terms for [formaldehyde](#), [NDD](#), [ALS](#), [AD](#), [PD](#), [MS](#), and [brain tumor](#). To obtain the disease genes, only curated gene-association data were taken into account; curated implies that the gene of interest serves as a biomarker of the disease, is important in the etiology of the disease, or is used as a

therapeutic target for disease treatment. The gene association data that were obtained for the “Neurodegenerative Diseases” term (parent term NDD in MeSH tree) were corrected with what was already found in the results for AD, ALS and PD individually (the MeSH term “Neurodegenerative Diseases” includes a collection of different neuropathies, known as child terms). The other NDD (oNDD) group contains gene association data for the remaining NDD subtypes excluding ALS, AD, and PD. Within the MeSH tree, MS is not defined under the parent term “Neurodegenerative Diseases,” but instead is categorized under [“Demyelinating Autoimmune Diseases, CNS”](#).

### ***A3.2 Inference of common biomarker genes***

If chemical A interacts with gene B (via a curated chemical–gene interaction) and gene B is independently associated with disease C (via a curated gene–disease relationship), then it may be inferred that chemical A has a potential relationship with disease C (inferred via gene B). This integration provides possible chemical–gene–disease connections that may not otherwise be apparent and may form the basis for testable hypotheses about the mechanisms underlying the etiology of environmental disease, such as formaldehyde-induced NDDs and brain cancer.

### ***A3.3 Gene set enrichment analysis (GSEA)***

Each gene list obtained from CTD was copied and pasted into the ClueGO app and used for GSEA. We defined significant pathways as those with 1) a minimum of three formaldehyde genes or 2) four percent of total genes affected by formaldehyde in a pathway (see the [“ClueGO predefined selection criteria” document](#)). The resulting matrix files containing significant pathways on the rows and involved genes on the columns were used for further integration and visualization purposes.

**Supplementary Table 1.** Measures of association and International Classification of Disease (ICD) codes for brain tumor studies.

| <b>Study</b>                                   | <b>ICD-8</b>            |
|------------------------------------------------|-------------------------|
| <b>Brain tumor: Professional workers (N=5)</b> |                         |
| Hall, et al. <sup>66</sup>                     | 191-2                   |
| Hauptmann, et al. <sup>44</sup>                | 191-2, 225, 238.1       |
| Levine, et al. <sup>67</sup>                   | 191-2                   |
| Stroup, et al. <sup>68</sup>                   | 191-2                   |
| Wang, et al. <sup>69</sup>                     | NA (BC)                 |
| <b>Brain tumor: Industrial workers (N=7)</b>   |                         |
| Andjelkovich, et al. <sup>70</sup>             | 191-2                   |
| Beane Freeman, et al. <sup>42</sup>            | 191-2                   |
| Coggon, et al. <sup>43</sup>                   | 191-2                   |
| Fondelli, et al. <sup>71</sup>                 | 239                     |
| Jiang, et al. <sup>72</sup>                    | NA (BT)                 |
| Meyers, et al. <sup>45</sup>                   | C47, 70-72 <sup>a</sup> |
| Wong <sup>73</sup>                             | 191                     |

Abbreviations: BC, brain cancer; BT, brain tumor; N, number of studies; NA, not available; OR, odds ratio; SMR, standardized mortality ratio.

<sup>a</sup> ICD-10 codes

**Supplementary Table 2.** Quality assessment of the cohort studies in the meta-analyses. <sup>1</sup>

| Study                                | Selection                        |                                           |                                     |                            | Comparability<br>Controls for age | Outcome                               |                                  |                                       | Overall<br>score <sup>7</sup> |
|--------------------------------------|----------------------------------|-------------------------------------------|-------------------------------------|----------------------------|-----------------------------------|---------------------------------------|----------------------------------|---------------------------------------|-------------------------------|
|                                      | Representativeness of<br>exposed | Selection of non-<br>exposed <sup>2</sup> | Exposure<br>assessment <sup>3</sup> | Outcome<br>absent at start |                                   | Assessment<br>of outcome <sup>4</sup> | Follow-up<br>length <sup>5</sup> | Adequacy of<br>follow-up <sup>6</sup> |                               |
| <b>Amyotrophic lateral sclerosis</b> |                                  |                                           |                                     |                            |                                   |                                       |                                  |                                       |                               |
| Pinkerton, et al. <sup>52</sup>      | 1                                | 2                                         | 0                                   | 0                          | 1                                 | 1                                     | 2                                | 1                                     | 8                             |
| Roberts, et al. <sup>49</sup>        | 1                                | 1                                         | 1                                   | 0                          | 1                                 | 1                                     | 2                                | 1                                     | 8                             |
| Weisskopf, et al. <sup>51</sup>      | 1                                | 0                                         | 0                                   | 1                          | 1                                 | 1                                     | 1                                | 1                                     | 6                             |
| <b>Brain tumor (N=10)</b>            |                                  |                                           |                                     |                            |                                   |                                       |                                  |                                       |                               |
| Andjelkovich, et al. <sup>69</sup>   | 1                                | 2                                         | 1                                   | 0                          | 1                                 | 1                                     | 2                                | 1                                     | 9                             |
| Beane Freeman, et al. <sup>42</sup>  | 1                                | 2                                         | 2                                   | 0                          | 1                                 | 1                                     | 2                                | 1                                     | 10                            |
| Fondelli, et al. <sup>70</sup>       | 1                                | 0                                         | 1                                   | 0                          | 1                                 | 1                                     | 2                                | 1                                     | 7                             |
| Hall, et al. <sup>73</sup>           | 1                                | 0                                         | 1                                   | 0                          | 1                                 | 1                                     | 1                                | 1                                     | 6                             |
| Jiang, et al. <sup>71</sup>          | 1                                | 2                                         | 1                                   | 0                          | 1                                 | 2                                     | 2                                | 1                                     | 10                            |
| Levine, et al. <sup>74</sup>         | 1                                | 1                                         | 1                                   | 0                          | 1                                 | 1                                     | 2                                | 1                                     | 8                             |
| Meyers, et al. <sup>45</sup>         | 1                                | 2                                         | 2                                   | 0                          | 1                                 | 1                                     | 2                                | 1                                     | 10                            |
| Stroup, et al. <sup>75</sup>         | 1                                | 0                                         | 1                                   | 0                          | 1                                 | 1                                     | 2                                | 1                                     | 7                             |
| Wang, et al. <sup>76</sup>           | 1                                | 0                                         | 2                                   | 0                          | 1                                 | 2                                     | 1                                | 1                                     | 8                             |
| Wong <sup>72</sup>                   | 1                                | 0                                         | 0                                   | 0                          | 1                                 | 1                                     | 2                                | 1                                     | 6                             |

<sup>1</sup> The study quality was assessed according to the Newcastle Ottawa Quality assessment scale for cohort studies <sup>77</sup>. One point was awarded for yes, and zero points were awarded for no, unable to determine, or inadequate, unless specified below.

<sup>2</sup> Two points were awarded if controls were selected from the same cohort, one point was awarded for controls specific to the county/province, and no points were awarded for using US standard population controls.

<sup>3</sup> Two points were awarded for measured exposures, one point was awarded for secure record of job title, and no points were awarded for incomplete exposure assessment/self-report.

<sup>4</sup> Two points were awarded for histological/medical verification, one point was awarded for death certificate, and no points were awarded for self-report.

<sup>5</sup> Two points were awarded for a follow-up period of greater than 20 years, one point was awarded for a follow-up of greater than ten years, and no points were awarded for a follow-up period less than 10 years.

<sup>6</sup> Less than 30% loss to follow-up was deemed adequate (one point awarded).

<sup>7</sup> A maximum of 12 points could be earned.



**Supplementary Table 3.** Quality assessment of case-control studies in the meta-analyses. <sup>1</sup>

| Study                                | Selection                             |                             |                                |                                     | Comparability    | Outcome                          |                    |                                | Overall quality score <sup>7</sup> |
|--------------------------------------|---------------------------------------|-----------------------------|--------------------------------|-------------------------------------|------------------|----------------------------------|--------------------|--------------------------------|------------------------------------|
|                                      | Adequate case definition <sup>2</sup> | Representativeness of cases | Control selection <sup>3</sup> | Definition of controls <sup>4</sup> | Controls for age | Exposure assessment <sup>5</sup> | Method consistency | Non-response rate <sup>6</sup> |                                    |
| <b>Amyotrophic lateral sclerosis</b> |                                       |                             |                                |                                     |                  |                                  |                    |                                |                                    |
| Fang, et al. <sup>47</sup>           | 2                                     | 1                           | 2                              | 2                                   | 1                | 2                                | 1                  | 1                              | 12                                 |
| Peters, et al. <sup>48</sup>         | 2                                     | 1                           | 2                              | 2                                   | 1                | 1                                | 1                  | 1                              | 11                                 |
| Seals, et al. <sup>50</sup>          | 2                                     | 1                           | 2                              | 2                                   | 1                | 1                                | 1                  | 1                              | 11                                 |
| <b>Brain tumor</b>                   |                                       |                             |                                |                                     |                  |                                  |                    |                                |                                    |
| Hauptmann, et al. <sup>44</sup>      | 1                                     | 1                           | 2                              | 1                                   | 1                | 2                                | 1                  | 1                              | 10                                 |
| Coggon, et al. <sup>43</sup>         | 1                                     | 1                           | 2                              | 2                                   | 1                | 2                                | 1                  | 1                              | 11                                 |

<sup>1</sup> The study quality was assessed according to the Newcastle Ottawa Quality assessment scale for case-control studies <sup>77</sup>. One point was awarded for yes, and zero points were awarded for no, unable to determine, or inadequate, unless specified below.

<sup>2</sup> Two points were awarded for histological/medical verification, one point was awarded for death certificate, and no points were awarded for self-report.

<sup>3</sup> Two points were awarded if controls were selected from the same company/community, one point was awarded for controls specific to the county/province, and zero points were awarded for no description.

<sup>4</sup> Two points were awarded for controls with no history of the disease, one point was awarded for a control with no disease at the time of death, and zero points were awarded for no description.

<sup>5</sup> Two points were awarded for measured exposures/blinded interview, one point was awarded for secure record of job title, and no points were awarded for incomplete exposure assessment.

<sup>6</sup> Less than 30% non-response rate was deemed adequate (one point awarded).

<sup>7</sup> A maximum of 12 points could be earned.

**Supplementary Table 4.** Comparison of current and previous meta-analyses on brain cancer.

| Studies                                  | Blair <i>et al.</i> 1990                 |      |    | Bosetti <i>et al.</i> 2008                 |      |    | Current meta-analysis (2020)    |       |    |
|------------------------------------------|------------------------------------------|------|----|--------------------------------------------|------|----|---------------------------------|-------|----|
|                                          | Group                                    | RR   | N  | Group                                      | RR   | N  | Group                           | RR    | N  |
| Andjelkovich, et al. <sup>66</sup>       | Not used                                 |      |    | Same                                       |      |    | Ever                            | 0.62  | 2  |
| Beane Freeman, et al. <sup>42</sup>      | Not used                                 |      |    | Not used                                   |      |    | Peak ≥ 4.0 ppm                  | 1.07  | 13 |
| Coggon, et al. <sup>106</sup>            | Not used                                 |      |    | Not used                                   |      |    | >2.0 ppm                        | 0.56  | 8  |
| Fondelli, et al. <sup>67</sup>           | Not used                                 |      |    | Not used                                   |      |    | Ever                            | 10.03 | 2  |
| Hall, et al. <sup>68</sup>               | Not used                                 |      |    | Same                                       |      |    | Ever                            | 2.18  | 6  |
| Hauptmann, et al. <sup>44</sup>          | Not used                                 |      |    | Not used                                   |      |    | Peak ≥ 9.3 ppm                  | 1.9   | 11 |
| Jiang, et al. <sup>69</sup>              | Not used                                 |      |    | Not used                                   |      |    | Duration 20+ years              | 3.90  | 1  |
| Levine, et al. <sup>70</sup>             | Same                                     |      |    | Same                                       |      |    | Ever                            | 1.15  | 3  |
| Meyers, et al. <sup>45</sup>             | Not used                                 |      |    | Not used                                   |      |    | Duration 20+ years              | 1.72  | 11 |
| Stroup, et al. <sup>71</sup>             | Ever, US standard control                | 2.7  | 10 | Ever, US standard control                  | 2.7  | 10 | Gross anatomy                   | 3.9   | 4  |
| Wang, et al. <sup>72</sup>               | Not used                                 |      |    | Not used                                   |      |    | Ever                            | 8.27  | 2  |
| Wong <sup>73</sup>                       | Not used                                 |      |    | Not used                                   |      |    | Hired before 1961               | 2.13  | 3  |
| Blair, et al. <sup>107</sup>             | Used                                     | 0.8  | 17 | Not used                                   |      |    | Not used, overlapping cohort    |       |    |
| Coggon, et al. <sup>106</sup>            | Not used                                 |      |    | Used                                       | 0.85 | 30 | Not used, overlapping cohort    |       |    |
| Harrington and Oakes <sup>108</sup>      | Used                                     | 3.3  | 4  | Not used                                   |      |    | Not used, overlapping cohort    |       |    |
| Hauptmann, et al. <sup>109 110</sup>     | Not used                                 |      |    | Used                                       | 0.92 | 43 | Not used, overlapping cohort    |       |    |
| Hayes, et al. <sup>111</sup>             | Not used                                 |      |    | Used                                       | 1.19 | 24 | Not used, overlapping cohort    |       |    |
| White                                    | Used                                     | 1.2  | 24 | Not used                                   |      |    | Not used, overlapping cohort    |       |    |
| Nonwhite                                 | Used                                     | 0.0  | 0  | Not used                                   |      |    | Not used, overlapping cohort    |       |    |
| Malker and Weiner <sup>112</sup>         | Used                                     | 0.9  | 89 | Not used                                   |      |    | Not used, low-exposure study    |       |    |
| Matanoski <sup>113</sup>                 | Not used                                 |      |    | Ever, US std. control                      | 1.34 | 13 | Not used, overlapping cohort    |       |    |
| Milham <sup>114</sup>                    | Used                                     | 0.6  | 1  | Not used                                   |      |    | Not used, overlapping cohort    |       |    |
| Pinkerton, et al. <sup>98</sup>          | Not used                                 |      |    | Used                                       | 1.09 | 19 | Not used, overlapping cohort    |       |    |
| Stayner, et al. <sup>115</sup>           | Used                                     | 0.7  | 5  | Not used                                   |      |    | Not used, overlapping cohort    |       |    |
| Walrath, et al. <sup>116</sup>           | Used                                     | 0.0  | 0  | Not used                                   |      |    | Not used, no brain tumor cases. |       |    |
| Walrath and Fraumeni <sup>117</sup>      | Used                                     | 1.56 | 9  | Used                                       | 1.56 | 9  | Not used, overlapping cohort    |       |    |
| Walrath and Fraumeni <sup>118</sup>      | Used                                     | 1.94 | 9  | Used                                       | 1.94 | 9  | Not used, overlapping cohort    |       |    |
| <b>Professionals meta-RR (95% CI)</b>    | <b>1.5 (1.2-2.0) N=9<sup>a,b</sup></b>   |      |    | <b>1.56 (1.24-1.96) N=7</b>                |      |    | <b>2.42 (1.41-4.17) N=5</b>     |       |    |
| <b>Industry workers meta-RR (95% CI)</b> | <b>0.9 (0.7-1.1)<sup>b</sup> N=3</b>     |      |    | <b>0.92 (0.75-1.13) N=4</b>                |      |    | <b>1.32 (0.72-2.44) N=7</b>     |       |    |
| <b>Overall meta-RR (95% CI)</b>          | <b>1.29 (0.95-1.76)<sup>c</sup> N=12</b> |      |    | <b>1.24 (0.99-1.55)<sup>c,d</sup> N=11</b> |      |    | <b>1.71 (1.07-2.73) N=12</b>    |       |    |

Abbreviations: CI, confidence interval; n, subjects; N/A, not available; PMR, proportional mortality ratio; RR, relative risk; SMR, standard mortality ratio.

<sup>a</sup> Hayes, et al.<sup>111</sup> reported white and nonwhite separately, so N = 2.

<sup>b</sup> Confidence interval calculated by Authors.

<sup>c</sup> Meta-RR calculated by Authors using random-effects model because heterogeneity was present ( $\chi^2 >$  degrees of freedom). Degrees of freedom = number of studies minus one.

<sup>d</sup> Risk estimates from original publications were used to calculate meta-RR because those reported in Bosetti, et al.<sup>41</sup> were slightly different. When the numbers from Bosetti, et al.<sup>41</sup> were used, the meta-RR was 1.26 (1.01-1.59).

**Supplementary Table 5.** Formaldehyde-gene association data from CTD related was compared with curated gene-disease associations for AD, ALS, PD, MS, brain tumor, and other types of NDD (oNDD).

| Gene    | AD | ALS | PD | MS | BT | oNDD | Gene    | AD | ALS | PD | MS | BT | oNDD |
|---------|----|-----|----|----|----|------|---------|----|-----|----|----|----|------|
| SOD2    | x  | x   | x  |    | x  | x    | CALM1   | x  |     |    |    |    |      |
| TNF     | x  | x   | x  |    |    | x    | BAX     | x  |     |    |    |    |      |
| SOD1    |    | x   | x  |    |    | x    | CRH     | x  |     |    |    |    |      |
| HMOX1   | x  |     | x  |    |    | x    | NOS3    | x  |     |    |    |    |      |
| IGF1R   | x  |     | x  |    |    | x    | FOS     |    | x   |    |    |    |      |
| MAPT    | x  |     | x  |    |    | x    | SNAI1   |    | x   |    |    |    |      |
| IL1B    | x  |     |    | x  |    | x    | JUND    |    | x   |    |    |    |      |
| TP53    |    | x   |    |    | x  |      | DBR1    |    | x   |    |    |    |      |
| VEGFA   | x  |     |    |    | x  |      | FUS     |    | x   |    |    |    |      |
| DRD2    |    |     | x  |    | x  |      | PLA2G4A |    | x   |    |    |    |      |
| CLU     | x  | x   |    |    |    |      | CREBBP  |    | x   |    |    |    |      |
| CST3    | x  | x   |    |    |    |      | LDLR    |    | x   |    |    |    |      |
| GSTP1   |    | x   | x  |    |    |      | PENK    |    | x   |    |    |    |      |
| CASP1   |    | x   |    | x  |    |      | SIX2    |    | x   |    |    |    |      |
| VAPB    |    | x   |    |    |    | x    | OPTN    |    | x   |    |    |    |      |
| TBK1    |    | x   |    |    |    | x    | UNC13A  |    | x   |    |    |    |      |
| SQSTM1  |    | x   |    |    |    | x    | PTGS2   |    | x   |    |    |    |      |
| CHCHD10 |    | x   |    |    |    | x    | DNAJC6  |    |     | x  |    |    |      |
| BDNF    | x  |     | x  |    |    |      | GIGYF2  |    |     | x  |    |    |      |
| BCHE    | x  |     |    | x  |    |      | SLC18A2 |    |     | x  |    |    |      |
| TFAM    | x  |     |    |    |    | x    | GPX1    |    |     | x  |    |    |      |
| GSK3B   | x  |     |    |    |    | x    | BAG5    |    |     | x  |    |    |      |
| PRNP    | x  |     |    |    |    | x    | VPS13C  |    |     | x  |    |    |      |
| TPP1    | x  |     |    |    |    | x    | SYNJ1   |    |     | x  |    |    |      |
| CASP3   | x  |     |    |    |    | x    | NR4A2   |    |     | x  |    |    |      |
| EDN1    |    |     | x  |    |    | x    | DDIT4   |    |     | x  |    |    |      |
| NGF     |    |     | x  |    |    | x    | MAP3K5  |    |     | x  |    |    |      |
| IL6     |    |     | x  |    |    | x    | NOS1    |    |     | x  |    |    |      |
| RAB39B  |    |     | x  |    |    | x    | DRD1    |    |     | x  |    |    |      |
| MAG     |    |     | x  |    |    | x    | HSPA1A  |    |     | x  |    |    |      |
| IFNG    |    |     |    | x  |    | x    | IL7R    |    |     |    | x  |    |      |
| KIF1B   |    |     |    | x  |    | x    | VCAM1   |    |     |    | x  |    |      |
| IL10    |    |     |    | x  |    | x    | CBLB    |    |     |    | x  |    |      |
| POMC    |    |     |    | x  |    | x    | ICAM1   |    |     |    | x  |    |      |
| PAXIP1  | x  |     |    |    |    |      | CD40    |    |     |    | x  |    |      |
| DHCR24  | x  |     |    |    |    |      | NLRP3   |    |     |    | x  |    |      |
| BCL2    | x  |     |    |    |    |      | TNFAIP3 |    |     |    | x  |    |      |
| ARC     | x  |     |    |    |    |      | AGTR1   |    |     |    |    | x  |      |
| MPO     | x  |     |    |    |    |      | GLI2    |    |     |    |    | x  |      |

|       |   |        |   |
|-------|---|--------|---|
| HRAS  | x | YAP1   | x |
| CDK6  | x | PPM1D  | x |
| ITGB2 | x | SOX2   | x |
| APC   | x | GH1    | x |
| PTCH1 | x | CCND1  | x |
| FJX1  | x | MSH6   | x |
| TGM2  | x | IL2    | x |
| RELA  | x | IQGAP2 | x |
| CTC1  | x | NRARP  | x |

Genes only associated with other NDD (N = 78) are not shown.

**Supplementary Table 6.** Significantly enriched pathways for formaldehyde and the NDD subgroups or brain tumor related genes.

| Pathway name                                                    | Diseases                  | AD |       |          | ALS |       |          | PD |       |          | BT |       |          | MS |      |          | oNDD |           |          |
|-----------------------------------------------------------------|---------------------------|----|-------|----------|-----|-------|----------|----|-------|----------|----|-------|----------|----|------|----------|------|-----------|----------|
|                                                                 |                           | #  | %     | p        | #   | %     | p        | #  | %     | p        | #  | %     | p        | #  | %    | p        | #    | %         | p        |
| Folate Metabolism                                               | AD, ALS, BT, MS, PD, oNDD | 4  | 5.71  | 1.10E-04 | 5   | 7.14  | 1.59E-06 | 6  | 8.57  | 1.04E-07 | 4  | 5.71  | 6.16E-05 | 3  | 4.29 | 3.58E-04 | 8    | 11.428572 | 3.97E-07 |
| Photodynamic therapy-induced AP-1 survival signaling.           | AD, ALS, BT, PD, oNDDs    | 3  | 5.88  | 8.14E-04 | 3   | 5.88  | 4.56E-04 | 3  | 5.88  | 7.12E-04 | 3  | 5.88  | 5.33E-04 |    |      |          | 3    | 5.882353  | 1.45E-02 |
| Vitamin B12 Metabolism                                          | AD, ALS, MS, PD, oNDD     | 4  | 7.55  | 3.66E-05 | 4   | 7.55  | 1.64E-05 | 4  | 7.55  | 3.04E-05 |    |       |          | 3  | 5.66 | 1.56E-04 | 6    | 11.320755 | 1.32E-05 |
| Chromosomal and microsatellite instability in colorectal cancer | AD, ALS, BT, oNDD         | 4  | 5.41  | 1.36E-04 | 4   | 5.41  | 6.19E-05 |    |       |          | 4  | 5.41  | 7.67E-05 |    |      |          |      |           |          |
| Photodynamic therapy-induced NF-kB survival signaling           | AD, BT, MS, oNDD          | 3  | 8.57  | 2.66E-04 |     |       |          |    |       |          | 4  | 11.43 | 3.78E-06 | 3  | 8.57 | 4.46E-05 | 5    | 14.285714 | 2.30E-05 |
| Amyotrophic lateral sclerosis (ALS)                             | AD, ALS, PD, oNDD         | 5  | 13.16 | 1.99E-07 | 5   | 13.16 | 7.00E-08 | 5  | 13.16 | 1.56E-07 |    |       |          |    |      |          | 5    | 13.157895 | 3.48E-05 |
| Selenium Micronutrient Network                                  | AD, ALS, PD, oNDD         | 4  | 4.49  | 2.79E-04 | 5   | 5.62  | 5.26E-06 | 5  | 5.62  | 1.15E-05 |    |       |          |    |      |          | 7    | 7.8651686 | 2.75E-05 |
| Oncostatin M Signaling Pathway                                  | ALS, BT, oNDD             |    |       |          | 4   | 6.06  | 3.94E-05 |    |       |          | 4  | 6.06  | 4.89E-05 |    |      |          | 4    | 6.060606  | 4.27E-03 |
| Copper homeostasis                                              | AD, BT, oNDD              | 4  | 7.41  | 3.94E-05 |     |       |          |    |       |          | 3  | 5.56  | 6.31E-04 |    |      |          | 5    | 9.259259  | 1.94E-04 |
| Oxidative Stress                                                | ALS, PD, oNDD             |    |       |          | 3   | 10    | 9.25E-05 | 4  | 13.33 | 3.00E-06 |    |       |          |    |      |          | 4    | 13.333333 | 2.13E-04 |
| Viral Acute Myocarditis                                         | AD, PD, oNDD              | 5  | 5.88  | 1.16E-05 |     |       |          | 4  | 4.71  | 1.95E-04 |    |       |          |    |      |          | 13   | 15.294118 | 1.32E-12 |
| Lung fibrosis                                                   | AD, PD, oNDD              | 3  | 4.76  | 1.51E-03 |     |       |          | 4  | 6.35  | 6.04E-05 |    |       |          |    |      |          | 8    | 12.698413 | 1.72E-07 |
| Overview of nanoparticle effects                                | AD, PD, oNDD              | 4  | 21.05 | 5.26E-07 |     |       |          | 3  | 15.79 | 3.56E-05 |    |       |          |    |      |          | 4    | 21.052631 | 3.27E-05 |
| Allograft Rejection                                             | AD, MS, oNDD              | 4  | 4.44  | 2.91E-04 |     |       |          |    |       |          |    |       |          | 4  | 4.44 | 2.63E-05 | 8    | 8.888889  | 2.79E-06 |
| Endochondral Ossification                                       | AD, BT                    | 3  | 4.62  | 1.65E-03 |     |       |          |    |       |          | 3  | 4.62  | 1.09E-03 |    |      |          |      |           |          |
| Hepatitis C and Hepatocellular Carcinoma                        | BT, oNDD                  |    |       |          |     |       |          |    |       |          | 3  | 5.88  | 5.33E-04 |    |      |          | 6    | 11.764706 | 1.05E-05 |
| Endometrial cancer                                              | BT, oNDD                  |    |       |          |     |       |          |    |       |          | 4  | 6.35  | 4.06E-05 |    |      |          | 3    | 4.7619047 | 2.54E-02 |
| ErbB Signaling Pathway                                          | BT, oNDD                  |    |       |          |     |       |          |    |       |          | 3  | 5.56  | 6.31E-04 |    |      |          | 3    | 5.555553  | 1.69E-02 |
| Pancreatic adenocarcinoma pathway                               | BT, oNDD                  |    |       |          |     |       |          |    |       |          | 5  | 5.62  | 6.93E-06 |    |      |          | 5    | 5.6179776 | 1.94E-03 |

|                                                                                        |           |   |       |      |   |      |          |  |    |           |          |
|----------------------------------------------------------------------------------------|-----------|---|-------|------|---|------|----------|--|----|-----------|----------|
| RAC1/PAK1/p38/MMP2 Pathway                                                             | BT, oNDD  |   |       |      | 4 | 5.8  | 5.82E-05 |  | 3  | 4.347826  | 3.21E-02 |
| Non-small cell lung cancer                                                             | BT, oNDD  |   |       |      | 4 | 6.06 | 4.89E-05 |  | 3  | 4.5454545 | 2.87E-02 |
| Apoptosis-related network due to altered Notch3 in ovarian cancer                      | ALS, oNDD |   | 3     | 5.56 |   |      | 5.40E-04 |  | 6  | 11.111111 | 1.48E-05 |
| TGF-beta Receptor Signaling                                                            | ALS, oNDD |   | 3     | 5.17 |   |      | 6.66E-04 |  | 5  | 8.620689  | 2.72E-04 |
| Aryl Hydrocarbon Receptor Pathway                                                      | AD, oNDD  | 3 | 6.25  |      |   |      | 6.81E-04 |  | 4  | 8.333333  | 1.32E-03 |
| TNF related weak inducer of apoptosis (TWEAK) Signaling Pathway                        | AD, oNDD  | 3 | 7.14  |      |   |      | 4.58E-04 |  | 6  | 14.285714 | 3.30E-06 |
| Alzheimers Disease                                                                     | AD, oNDD  | 6 | 4.03  |      |   |      | 1.22E-05 |  | 11 | 7.3825502 | 2.12E-07 |
| Cardiac Hypertrophic Response                                                          | AD, oNDD  | 3 | 5.26  |      |   |      | 1.13E-03 |  | 6  | 10.526316 | 2.03E-05 |
| T-Cell antigen Receptor (TCR) pathway during Staphylococcus aureus infection           | AD, oNDD  | 3 | 4.84  |      |   |      | 1.44E-03 |  | 5  | 8.064516  | 3.73E-04 |
| Leptin signaling pathway                                                               | AD, oNDD  | 4 | 5.26  |      |   |      | 1.51E-04 |  | 6  | 7.894737  | 1.05E-04 |
| IL-5 Signaling Pathway                                                                 | AD, oNDD  | 3 | 7.5   |      |   |      | 3.96E-04 |  | 6  | 15        | 2.45E-06 |
| Fas Ligand (FasL) pathway and Stress induction of Heat Shock Proteins (HSP) regulation | AD, oNDD  | 3 | 6.82  |      |   |      | 5.26E-04 |  | 6  | 13.636364 | 4.37E-06 |
| NO/cGMP/PKG mediated Neuroprotection                                                   | AD, oNDD  | 5 | 10.42 |      |   |      | 6.62E-07 |  | 3  | 6.25      | 1.23E-02 |
| Prion disease pathway                                                                  | AD, oNDD  | 3 | 8.11  |      |   |      | 3.14E-04 |  | 5  | 13.513514 | 3.05E-05 |
| Corticotropin-releasing hormone signaling pathway                                      | AD, oNDD  | 5 | 5.38  |      |   |      | 1.80E-05 |  | 8  | 8.602151  | 3.57E-06 |
| Spinal Cord Injury                                                                     | PD, oNDD  |   | 5     | 4.17 |   |      | 4.92E-05 |  | 12 | 10        | 1.73E-09 |
| Association Between Physico-Chemical Features and Toxicity Associated Pathways         | PD, oNDD  |   | 3     | 4.41 |   |      | 1.65E-03 |  | 3  | 4.4117646 | 3.09E-02 |

|                                                                |          |  |   |       |          |  |  |  |   |          |          |
|----------------------------------------------------------------|----------|--|---|-------|----------|--|--|--|---|----------|----------|
| One carbon metabolism and related pathways                     | PD, oNDD |  | 3 | 5.56  | 8.42E-04 |  |  |  | 3 | 5.555553 | 1.69E-02 |
| IL1 and megakaryocytes in obesity                              | MS, oNDD |  |   |       |          |  |  |  | 4 | 16       | 1.40E-07 |
| Cytokines and Inflammatory Response                            | MS, oNDD |  |   |       |          |  |  |  | 3 | 11.11    | 2.01E-05 |
| Aryl Hydrocarbon Receptor                                      | BT       |  |   |       |          |  |  |  | 3 | 6.25     | 4.45E-04 |
| G1 to S cell cycle control                                     | BT       |  |   |       |          |  |  |  | 3 | 4.69     | 1.04E-03 |
| Tumor suppressor activity of SMARCB1                           | BT       |  |   |       |          |  |  |  | 3 | 9.09     | 1.45E-04 |
| Bladder Cancer                                                 | BT       |  |   |       |          |  |  |  | 4 | 9.76     | 7.23E-06 |
| DNA Damage Response                                            | BT       |  |   |       |          |  |  |  | 3 | 4.35     | 1.29E-03 |
| Hedgehog Signaling Pathway                                     | BT       |  |   |       |          |  |  |  | 3 | 6.82     | 3.44E-04 |
| miRNAs involved in DNA damage response                         | BT       |  |   |       |          |  |  |  | 3 | 6        | 5.03E-04 |
| DNA Damage Response (only ATM dependent)                       | BT       |  |   |       |          |  |  |  | 5 | 4.35     | 2.43E-05 |
| Retinoblastoma Gene in Cancer                                  | BT       |  |   |       |          |  |  |  | 4 | 4.55     | 1.51E-04 |
| Wnt Signaling Pathway                                          | BT       |  |   |       |          |  |  |  | 3 | 5.66     | 5.97E-04 |
| Signaling Pathways in Glioblastoma                             | BT       |  |   |       |          |  |  |  | 5 | 6.02     | 4.91E-06 |
| Integrated Cancer Pathway                                      | AD       |  | 3 | 6.52  | 6.00E-04 |  |  |  |   |          |          |
| Oxidative Damage                                               | AD       |  | 3 | 7.32  | 4.27E-04 |  |  |  |   |          |          |
| Regulation of Apoptosis by Parathyroid Hormone-related Protein | AD       |  | 3 | 13.64 | 6.45E-05 |  |  |  |   |          |          |
| Nanomaterial induced apoptosis                                 | AD       |  | 3 | 15    | 4.80E-05 |  |  |  |   |          |          |
| Apoptosis                                                      | AD       |  | 5 | 5.81  | 1.23E-05 |  |  |  |   |          |          |
| Sleep regulation                                               | PD       |  |   |       |          |  |  |  | 3 | 7.89     | 2.97E-04 |
| Phosphodiesterases in neuronal function                        | PD       |  |   |       |          |  |  |  | 3 | 5.45     | 8.88E-04 |

|                                                         |    |   |      |          |
|---------------------------------------------------------|----|---|------|----------|
| Type II interferon signaling (IFNG)                     | MS | 3 | 8.11 | 5.28E-05 |
| Nucleotide-binding Oligomerization Domain (NOD) pathway | MS | 3 | 7.32 | 7.21E-05 |

Pathways only associated with other NDD (N = 50) are not shown.



**Supplementary Table 7.** Connection between genes and pathways associated with formaldehyde.

| Gene name | Pathway name                                                                                                                                                                                                                                                                                                                                                                                                                                                                                                                                                                                                                               |
|-----------|--------------------------------------------------------------------------------------------------------------------------------------------------------------------------------------------------------------------------------------------------------------------------------------------------------------------------------------------------------------------------------------------------------------------------------------------------------------------------------------------------------------------------------------------------------------------------------------------------------------------------------------------|
| AHCY      | Folate Metabolism                                                                                                                                                                                                                                                                                                                                                                                                                                                                                                                                                                                                                          |
| APC       | Chromosomal and microsatellite instability in colorectal cancer<br>DNA Damage Response (only ATM dependent)<br>Copper homeostasis<br>Wnt Signaling Pathway<br>Endometrial cancer                                                                                                                                                                                                                                                                                                                                                                                                                                                           |
| BAX       | Apoptosis<br>Chromosomal and microsatellite instability in colorectal cancer<br>Integrated Cancer Pathway<br>Viral Acute Myocarditis<br>Regulation of Apoptosis by Parathyroid Hormone-related Protein<br>Photodynamic therapy-induced AP-1 survival signaling.<br>Leptin signaling pathway<br>Overview of nanoparticle effects<br>Aryl Hydrocarbon Receptor Pathway<br>Nanomaterial induced apoptosis<br>Amyotrophic lateral sclerosis (ALS)                                                                                                                                                                                              |
| BCL2      | Oxidative Damage<br>Fas Ligand (FasL) pathway and Stress induction of Heat Shock Proteins (HSP) regulation<br>Corticotropin-releasing hormone signaling pathway<br>Integrated Cancer Pathway<br>Photodynamic therapy-induced AP-1 survival signaling.<br>Prion disease pathway<br>Viral Acute Myocarditis<br>Overview of nanoparticle effects<br>Regulation of Apoptosis by Parathyroid Hormone-related Protein<br>Chromosomal and microsatellite instability in colorectal cancer<br>Apoptosis<br>NO/cGMP/PKG mediated Neuroprotection<br>IL-5 Signaling Pathway<br>Amyotrophic lateral sclerosis (ALS)<br>Nanomaterial induced apoptosis |
| BDNF      | Spinal Cord Injury                                                                                                                                                                                                                                                                                                                                                                                                                                                                                                                                                                                                                         |
| CALM1     | Cardiac Hypertrophic Response<br>Alzheimers Disease<br>T-Cell antigen Receptor (TCR) pathway during Staphylococcus aureus infection<br>NO/cGMP/PKG mediated Neuroprotection<br>Endochondral Ossification                                                                                                                                                                                                                                                                                                                                                                                                                                   |
| CASP1     | Amyotrophic lateral sclerosis (ALS)<br>Nucleotide-binding Oligomerization Domain (NOD) pathway                                                                                                                                                                                                                                                                                                                                                                                                                                                                                                                                             |
| CASP3     | Corticotropin-releasing hormone signaling pathway<br>Alzheimers Disease<br>Fas Ligand (FasL) pathway and Stress induction of Heat Shock Proteins (HSP) regulation<br>Chromosomal and microsatellite instability in colorectal cancer<br>Copper homeostasis<br>Prion disease pathway<br>TNF related weak inducer of apoptosis (TWEAK) Signaling Pathway<br>Viral Acute Myocarditis<br>Allograft Rejection<br>Amyotrophic lateral sclerosis (ALS)<br>Integrated Cancer Pathway<br>Oxidative Damage<br>Apoptosis<br>Nanomaterial induced apoptosis<br>Brain-Derived Neurotrophic Factor (BDNF) signaling pathway<br>MAPK Signaling Pathway    |

|        |                                                                                                                                                                                                                                                                                                                                                                                                                                                                                                                                                                                                                                                                                                                                               |
|--------|-----------------------------------------------------------------------------------------------------------------------------------------------------------------------------------------------------------------------------------------------------------------------------------------------------------------------------------------------------------------------------------------------------------------------------------------------------------------------------------------------------------------------------------------------------------------------------------------------------------------------------------------------------------------------------------------------------------------------------------------------|
|        | <p>AGE/RAGE pathway<br/> Oncostatin M Signaling Pathway<br/> Spinal Cord Injury<br/> Hepatitis C and Hepatocellular Carcinoma<br/> TNF alpha Signaling Pathway<br/> Prolactin Signaling Pathway<br/> Sudden Infant Death Syndrome (SIDS) Susceptibility Pathways</p>                                                                                                                                                                                                                                                                                                                                                                                                                                                                          |
| CAV1   | <p>Non-genomic actions of 1,25 dihydroxyvitamin D3<br/> VEGFA-VEGFR2 Signaling Pathway<br/> Viral Acute Myocarditis</p>                                                                                                                                                                                                                                                                                                                                                                                                                                                                                                                                                                                                                       |
| CCND1  | <p>miRNAs involved in DNA damage response<br/> Chromosomal and microsatellite instability in colorectal cancer<br/> Endometrial cancer<br/> Retinoblastoma Gene in Cancer<br/> Photodynamic therapy-induced AP-1 survival signaling.<br/> Photodynamic therapy-induced NF-kB survival signaling<br/> Wnt Signaling Pathway<br/> Copper homeostasis<br/> G1 to S cell cycle control<br/> ErbB Signaling Pathway<br/> Hedgehog Signaling Pathway<br/> Hepatitis C and Hepatocellular Carcinoma<br/> Pancreatic adenocarcinoma pathway<br/> DNA Damage Response (only ATM dependent)<br/> DNA Damage Response<br/> Bladder Cancer<br/> Non-small cell lung cancer<br/> Signaling Pathways in Glioblastoma</p>                                    |
| CD40   | <p>Allograft Rejection</p>                                                                                                                                                                                                                                                                                                                                                                                                                                                                                                                                                                                                                                                                                                                    |
| CDK6   | <p>DNA Damage Response<br/> Pancreatic adenocarcinoma pathway<br/> Tumor suppressor activity of SMARCB1<br/> Wnt Signaling Pathway<br/> G1 to S cell cycle control<br/> Signaling Pathways in Glioblastoma<br/> Retinoblastoma Gene in Cancer<br/> Non-small cell lung cancer<br/> miRNAs involved in DNA damage response</p>                                                                                                                                                                                                                                                                                                                                                                                                                 |
| CREBBP | <p>TGF-beta Receptor Signaling</p>                                                                                                                                                                                                                                                                                                                                                                                                                                                                                                                                                                                                                                                                                                            |
| CRH    | <p>Corticotropin-releasing hormone signaling pathway</p>                                                                                                                                                                                                                                                                                                                                                                                                                                                                                                                                                                                                                                                                                      |
| CST3   | <p>Amyotrophic lateral sclerosis (ALS)</p>                                                                                                                                                                                                                                                                                                                                                                                                                                                                                                                                                                                                                                                                                                    |
| CXCL8  | <p>miRNAs in the signaling pathway of the immune response in sepsis<br/> Allograft Rejection<br/> TLR4 Signaling and Tolerance<br/> EBV LMP1 signaling<br/> IL-3 Signaling Pathway<br/> Corticotropin-releasing hormone signaling pathway<br/> Non-genomic actions of 1,25 dihydroxyvitamin D3<br/> Lung fibrosis<br/> Toll-like Receptor Signaling Pathway<br/> Photodynamic therapy-induced NF-kB survival signaling<br/> Senescence and Autophagy in Cancer<br/> Sudden Infant Death Syndrome (SIDS) Susceptibility Pathways<br/> Hepatitis C and Hepatocellular Carcinoma<br/> Overview of nanoparticle effects<br/> Thymic Stromal Lymphopoietin (TSLP) Signaling Pathway<br/> RIG-I-like Receptor Signaling<br/> Spinal Cord Injury</p> |

|         |                                                                                                                                                                                                                                                                                                                                                                                                                                                                                                                                                                                                                                                                                                                                                                                                                                                                                                                 |
|---------|-----------------------------------------------------------------------------------------------------------------------------------------------------------------------------------------------------------------------------------------------------------------------------------------------------------------------------------------------------------------------------------------------------------------------------------------------------------------------------------------------------------------------------------------------------------------------------------------------------------------------------------------------------------------------------------------------------------------------------------------------------------------------------------------------------------------------------------------------------------------------------------------------------------------|
|         | Regulation of toll-like receptor signaling pathway<br>VEGFA-VEGFR2 Signaling Pathway                                                                                                                                                                                                                                                                                                                                                                                                                                                                                                                                                                                                                                                                                                                                                                                                                            |
| DRD1    | Sleep regulation<br>Phosphodiesterases in neuronal function<br>Phosphodiesterases in neuronal function<br>Sleep regulation                                                                                                                                                                                                                                                                                                                                                                                                                                                                                                                                                                                                                                                                                                                                                                                      |
| EDN1    | Lung fibrosis<br>Viral Acute Myocarditis<br>MicroRNAs in cardiomyocyte hypertrophy<br>Physiological and Pathological Hypertrophy of the Heart                                                                                                                                                                                                                                                                                                                                                                                                                                                                                                                                                                                                                                                                                                                                                                   |
| EGR2    | Brain-Derived Neurotrophic Factor (BDNF) signaling pathway<br>Adipogenesis                                                                                                                                                                                                                                                                                                                                                                                                                                                                                                                                                                                                                                                                                                                                                                                                                                      |
| EIF2AK3 | VEGFA-VEGFR2 Signaling Pathway<br>Alzheimers Disease                                                                                                                                                                                                                                                                                                                                                                                                                                                                                                                                                                                                                                                                                                                                                                                                                                                            |
| EPO     | EPO Receptor Signaling<br>Hematopoietic Stem Cell Differentiation<br>Differentiation Pathway                                                                                                                                                                                                                                                                                                                                                                                                                                                                                                                                                                                                                                                                                                                                                                                                                    |
| FOS     | Chromosomal and microsatellite instability in colorectal cancer<br>TGF-beta Receptor Signaling<br>Oncostatin M Signaling Pathway<br>Photodynamic therapy-induced AP-1 survival signaling.<br>Oxidative Stress                                                                                                                                                                                                                                                                                                                                                                                                                                                                                                                                                                                                                                                                                                   |
| GH1     | Endochondral Ossification                                                                                                                                                                                                                                                                                                                                                                                                                                                                                                                                                                                                                                                                                                                                                                                                                                                                                       |
| GLI2    | Tumor suppressor activity of SMARCB1<br>Hedgehog Signaling Pathway                                                                                                                                                                                                                                                                                                                                                                                                                                                                                                                                                                                                                                                                                                                                                                                                                                              |
| GPX1    | Oxidative Stress<br>Amyotrophic lateral sclerosis (ALS)<br>One carbon metabolism and related pathways<br>Selenium Micronutrient Network<br>Association Between Physico-Chemical Features and Toxicity Associated Pathways<br>Folate Metabolism                                                                                                                                                                                                                                                                                                                                                                                                                                                                                                                                                                                                                                                                  |
| GPX3    | One carbon metabolism and related pathways<br>Folate Metabolism<br>Oxidative Stress<br>Selenium Micronutrient Network                                                                                                                                                                                                                                                                                                                                                                                                                                                                                                                                                                                                                                                                                                                                                                                           |
| GSK3B   | Chromosomal and microsatellite instability in colorectal cancer<br>IL-5 Signaling Pathway<br>Cardiac Hypertrophic Response<br>Leptin signaling pathway<br>Copper homeostasis<br>Corticotropin-releasing hormone signaling pathway<br>Viral Acute Myocarditis<br>Alzheimers Disease<br>TNF related weak inducer of apoptosis (TWEAK) Signaling Pathway<br>T-Cell antigen Receptor (TCR) pathway during Staphylococcus aureus infection<br>Regulation of Apoptosis by Parathyroid Hormone-related Protein<br>Association Between Physico-Chemical Features and Toxicity Associated Pathways<br>IL-7 Signaling Pathway<br>Prolactin Signaling Pathway<br>VEGFA-VEGFR2 Signaling Pathway<br>Factors and pathways affecting insulin-like growth factor (IGF1)-Akt signaling<br>Notch Signaling Pathway<br>Endometrial cancer<br>Brain-Derived Neurotrophic Factor (BDNF) signaling pathway<br>IL17 signaling pathway |

|       |                                                                                                                                                                                                                                                                                                                                                                                                                                                                                                                                                                                                                                                                                                                                                                                                                                                                    |
|-------|--------------------------------------------------------------------------------------------------------------------------------------------------------------------------------------------------------------------------------------------------------------------------------------------------------------------------------------------------------------------------------------------------------------------------------------------------------------------------------------------------------------------------------------------------------------------------------------------------------------------------------------------------------------------------------------------------------------------------------------------------------------------------------------------------------------------------------------------------------------------|
|       | <ul style="list-style-type: none"> <li>ErbB Signaling Pathway</li> <li>IL-6 signaling pathway</li> <li>Regulation of Microtubule Cytoskeleton</li> <li>Energy Metabolism</li> <li>MicroRNAs in cardiomyocyte hypertrophy</li> <li>Senescence and Autophagy in Cancer</li> </ul>                                                                                                                                                                                                                                                                                                                                                                                                                                                                                                                                                                                    |
| HMOX1 | <ul style="list-style-type: none"> <li>Lung fibrosis</li> <li>Overview of nanoparticle effects</li> <li>Oxidative Stress</li> </ul>                                                                                                                                                                                                                                                                                                                                                                                                                                                                                                                                                                                                                                                                                                                                |
| HRAS  | <ul style="list-style-type: none"> <li>Oncostatin M Signaling Pathway</li> <li>Bladder Cancer</li> <li>DNA Damage Response (only ATM dependent)</li> <li>Aryl Hydrocarbon Receptor</li> <li>RAC1/PAK1/p38/MMP2 Pathway</li> <li>Signaling Pathways in Glioblastoma</li> <li>Endometrial cancer</li> <li>ErbB Signaling Pathway</li> <li>Non-small cell lung cancer</li> </ul>                                                                                                                                                                                                                                                                                                                                                                                                                                                                                      |
| HSPA8 |                                                                                                                                                                                                                                                                                                                                                                                                                                                                                                                                                                                                                                                                                                                                                                                                                                                                    |
|       | MAPK Signaling Pathway                                                                                                                                                                                                                                                                                                                                                                                                                                                                                                                                                                                                                                                                                                                                                                                                                                             |
| HSPB1 |                                                                                                                                                                                                                                                                                                                                                                                                                                                                                                                                                                                                                                                                                                                                                                                                                                                                    |
|       | <ul style="list-style-type: none"> <li>MAPK Signaling Pathway</li> <li>Extracellular vesicles in the crosstalk of cardiac cells</li> <li>Apoptosis-related network due to altered Notch3 in ovarian cancer</li> <li>VEGFA-VEGFR2 Signaling Pathway</li> <li>Fas Ligand (FasL) pathway and Stress induction of Heat Shock Proteins (HSP) regulation</li> </ul>                                                                                                                                                                                                                                                                                                                                                                                                                                                                                                      |
| HSPD1 |                                                                                                                                                                                                                                                                                                                                                                                                                                                                                                                                                                                                                                                                                                                                                                                                                                                                    |
|       | <ul style="list-style-type: none"> <li>Sudden Infant Death Syndrome (SIDS) Susceptibility Pathways</li> <li>Apoptosis-related network due to altered Notch3 in ovarian cancer</li> </ul>                                                                                                                                                                                                                                                                                                                                                                                                                                                                                                                                                                                                                                                                           |
| ICAM1 |                                                                                                                                                                                                                                                                                                                                                                                                                                                                                                                                                                                                                                                                                                                                                                                                                                                                    |
|       | <ul style="list-style-type: none"> <li>IL1 and megakaryocytes in obesity</li> <li>Photodynamic therapy-induced NF-kB survival signaling</li> <li>Vitamin B12 Metabolism</li> <li>Type II interferon signaling (IFNG)</li> <li>Folate Metabolism</li> </ul>                                                                                                                                                                                                                                                                                                                                                                                                                                                                                                                                                                                                         |
| IFNG  |                                                                                                                                                                                                                                                                                                                                                                                                                                                                                                                                                                                                                                                                                                                                                                                                                                                                    |
|       | <ul style="list-style-type: none"> <li>Cytokines and Inflammatory Response</li> <li>Vitamin B12 Metabolism</li> <li>Allograft Rejection</li> <li>Folate Metabolism</li> <li>IL1 and megakaryocytes in obesity</li> <li>Type II interferon signaling (IFNG)</li> <li>Senescence and Autophagy in Cancer</li> <li>Non-genomic actions of 1,25 dihydroxyvitamin D3</li> <li>T-Cell antigen Receptor (TCR) pathway during Staphylococcus aureus infection</li> <li>Aryl Hydrocarbon Receptor Pathway</li> <li>NO/cGMP/PKG mediated Neuroprotection</li> <li>Spinal Cord Injury</li> <li>Photodynamic therapy-induced AP-1 survival signaling.</li> <li>TGF-beta Receptor Signaling</li> <li>RIG-I-like Receptor Signaling</li> <li>Viral Acute Myocarditis</li> <li>Development and heterogeneity of the ILC family</li> <li>Selenium Micronutrient Network</li> </ul> |
| IGF1R |                                                                                                                                                                                                                                                                                                                                                                                                                                                                                                                                                                                                                                                                                                                                                                                                                                                                    |
|       | <ul style="list-style-type: none"> <li>Apoptosis</li> <li>Endochondral Ossification</li> <li>Factors and pathways affecting insulin-like growth factor (IGF1)-Akt signaling</li> <li>Human Thyroid Stimulating Hormone (TSH) signaling pathway</li> <li>MicroRNAs in cardiomyocyte hypertrophy</li> <li>Senescence and Autophagy in Cancer</li> </ul>                                                                                                                                                                                                                                                                                                                                                                                                                                                                                                              |
| IL10  |                                                                                                                                                                                                                                                                                                                                                                                                                                                                                                                                                                                                                                                                                                                                                                                                                                                                    |
|       | <ul style="list-style-type: none"> <li>Allograft Rejection</li> <li>Cytokines and Inflammatory Response</li> </ul>                                                                                                                                                                                                                                                                                                                                                                                                                                                                                                                                                                                                                                                                                                                                                 |

T-Cell antigen Receptor (TCR) pathway during Staphylococcus aureus infection  
Sudden Infant Death Syndrome (SIDS) Susceptibility Pathways  
Viral Acute Myocarditis

IL1A

Sudden Infant Death Syndrome (SIDS) Susceptibility Pathways  
Structural Pathway of Interleukin 1 (IL-1)  
Fas Ligand (FasL) pathway and Stress induction of Heat Shock Proteins (HSP) regulation  
Photodynamic therapy-induced NF-kB survival signaling  
Allograft Rejection  
Spinal Cord Injury  
T-Cell antigen Receptor (TCR) Signaling Pathway  
MAPK Signaling Pathway  
Hematopoietic Stem Cell Differentiation  
miRNAs in the signaling pathway of the immune response in sepsis  
Cytokines and Inflammatory Response  
IL-1 signaling pathway  
Senescence and Autophagy in Cancer

IL1B

Vitamin B12 Metabolism  
Allograft Rejection  
Folate Metabolism  
Photodynamic therapy-induced NF-kB survival signaling  
Leptin signaling pathway  
Aryl Hydrocarbon Receptor Pathway  
Selenium Micronutrient Network  
NO/cGMP/PKG mediated Neuroprotection  
Alzheimers Disease  
Lung fibrosis  
Cytokines and Inflammatory Response  
IL1 and megakaryocytes in obesity  
Nucleotide-binding Oligomerization Domain (NOD) pathway  
Type II interferon signaling (IFNG)  
Sudden Infant Death Syndrome (SIDS) Susceptibility Pathways  
Oligodendrocyte Specification and differentiation(including remyelination), leading to Myelin Components for CNS  
MAPK Signaling Pathway  
Senescence and Autophagy in Cancer  
T-Cell antigen Receptor (TCR) Signaling Pathway  
Spinal Cord Injury  
Hematopoietic Stem Cell Differentiation  
Development and heterogeneity of the ILC family  
Toll-like Receptor Signaling Pathway  
Regulation of toll-like receptor signaling pathway  
IL-1 signaling pathway

IL2

Photodynamic therapy-induced AP-1 survival signaling.  
Folate Metabolism  
Photodynamic therapy-induced NF-kB survival signaling

IL6

Vitamin B12 Metabolism  
Folate Metabolism  
Overview of nanoparticle effects  
Photodynamic therapy-induced AP-1 survival signaling.  
Viral Acute Myocarditis  
Selenium Micronutrient Network  
Lung fibrosis  
Spinal Cord Injury  
Sleep regulation  
Sudden Infant Death Syndrome (SIDS) Susceptibility Pathways  
Non-genomic actions of 1,25 dihydroxyvitamin D3  
Photodynamic therapy-induced NF-kB survival signaling  
T-Cell antigen Receptor (TCR) Signaling Pathway  
IL-6 signaling pathway  
Senescence and Autophagy in Cancer  
Differentiation Pathway  
Extracellular vesicles in the crosstalk of cardiac cells  
Development and heterogeneity of the ILC family

|        |                                                                                                                                                                                                                                                                                                                                                                                                                                                                                                                                                                                                                                                                                                                                                                                                                                                                                                                                                                                                                                                                                                                                                                                                                                                                                                                                                                                                                                         |
|--------|-----------------------------------------------------------------------------------------------------------------------------------------------------------------------------------------------------------------------------------------------------------------------------------------------------------------------------------------------------------------------------------------------------------------------------------------------------------------------------------------------------------------------------------------------------------------------------------------------------------------------------------------------------------------------------------------------------------------------------------------------------------------------------------------------------------------------------------------------------------------------------------------------------------------------------------------------------------------------------------------------------------------------------------------------------------------------------------------------------------------------------------------------------------------------------------------------------------------------------------------------------------------------------------------------------------------------------------------------------------------------------------------------------------------------------------------|
|        | Hematopoietic Stem Cell Differentiation<br>Adipogenesis<br>TNF related weak inducer of apoptosis (TWEAK) Signaling Pathway<br>TLR4 Signaling and Tolerance<br>TNF alpha Signaling Pathway<br>Thymic Stromal LymphoPoietin (TSLP) Signaling Pathway<br>Cytokines and Inflammatory Response<br>Hepatitis C and Hepatocellular Carcinoma<br>Regulation of toll-like receptor signaling pathway<br>Toll-like Receptor Signaling Pathway                                                                                                                                                                                                                                                                                                                                                                                                                                                                                                                                                                                                                                                                                                                                                                                                                                                                                                                                                                                                     |
| ITPR1  | Serotonin Receptor 2 and ELK-SRF/GATA4 signaling<br>T-Cell antigen Receptor (TCR) Signaling Pathway<br>Alzheimers Disease                                                                                                                                                                                                                                                                                                                                                                                                                                                                                                                                                                                                                                                                                                                                                                                                                                                                                                                                                                                                                                                                                                                                                                                                                                                                                                               |
| JUND   | Oncostatin M Signaling Pathway<br>Apoptosis-related network due to altered Notch3 in ovarian cancer                                                                                                                                                                                                                                                                                                                                                                                                                                                                                                                                                                                                                                                                                                                                                                                                                                                                                                                                                                                                                                                                                                                                                                                                                                                                                                                                     |
| LDLR   | Selenium Micronutrient Network<br>Folate Metabolism<br>Vitamin B12 Metabolism<br>Oncostatin M Signaling Pathway                                                                                                                                                                                                                                                                                                                                                                                                                                                                                                                                                                                                                                                                                                                                                                                                                                                                                                                                                                                                                                                                                                                                                                                                                                                                                                                         |
| LMNA   | Fas Ligand (FasL) pathway and Stress induction of Heat Shock Proteins (HSP) regulation<br>Adipogenesis                                                                                                                                                                                                                                                                                                                                                                                                                                                                                                                                                                                                                                                                                                                                                                                                                                                                                                                                                                                                                                                                                                                                                                                                                                                                                                                                  |
| MAG    | Spinal Cord Injury<br>Oligodendrocyte Specification and differentiation leading to Myelin Components for CNS                                                                                                                                                                                                                                                                                                                                                                                                                                                                                                                                                                                                                                                                                                                                                                                                                                                                                                                                                                                                                                                                                                                                                                                                                                                                                                                            |
| MAP3K5 | Amyotrophic lateral sclerosis (ALS)<br>Photodynamic therapy-induced AP-1 survival signaling.                                                                                                                                                                                                                                                                                                                                                                                                                                                                                                                                                                                                                                                                                                                                                                                                                                                                                                                                                                                                                                                                                                                                                                                                                                                                                                                                            |
| MAPK1  | Pancreatic adenocarcinoma pathway<br>Prion disease pathway<br>TNF related weak inducer of apoptosis (TWEAK) Signaling Pathway<br>AGE/RAGE pathway<br>IL-2 Signaling Pathway<br>Physiological and Pathological Hypertrophy of the Heart<br>PDGF Pathway<br>IL-7 Signaling Pathway<br>TGF-B Signaling in Thyroid Cells for Epithelial-Mesenchymal Transition<br>RAC1/PAK1/p38/MMP2 Pathway<br>IL17 signaling pathway<br>Cardiac Hypertrophic Response<br>Thymic Stromal LymphoPoietin (TSLP) Signaling Pathway<br>IL-6 signaling pathway<br>Chromosomal and microsatellite instability in colorectal cancer<br>Senescence and Autophagy in Cancer<br>EBV LMP1 signaling<br>Association Between Physico-Chemical Features and Toxicity Associated Pathways<br>Corticotropin-releasing hormone signaling pathway<br>TCA Cycle Nutrient Utilization and Invasiveness of Ovarian Cancer<br>Spinal Cord Injury<br>Alzheimers Disease<br>Interleukin-11 Signaling Pathway<br>IL-5 Signaling Pathway<br>IL-3 Signaling Pathway<br>Non-small cell lung cancer<br>MET in type 1 papillary renal cell carcinoma<br>IL-1 signaling pathway<br>Toll-like Receptor Signaling Pathway<br>Apoptosis-related network due to altered Notch3 in ovarian cancer<br>Regulation of toll-like receptor signaling pathway<br>Kit receptor signaling pathway<br>TNF alpha Signaling Pathway<br>RANKL/RANK (Receptor activator of NFKB (ligand)) Signaling Pathway |

VEGFA-VEGFR2 Signaling Pathway  
 Viral Acute Myocarditis  
 Leptin signaling pathway  
 Brain-Derived Neurotrophic Factor (BDNF) signaling pathway  
 Oncostatin M Signaling Pathway  
 IL-9 Signaling Pathway  
 Signaling of Hepatocyte Growth Factor Receptor  
 IL-4 Signaling Pathway  
 Endometrial cancer  
 Structural Pathway of Interleukin 1 (IL-1)  
 Serotonin Receptor 2 and ELK-SRF/GATA4 signaling  
 Prolactin Signaling Pathway  
 EPO Receptor Signaling  
 Non-genomic actions of 1,25 dihydroxyvitamin D3  
 MAPK Signaling Pathway  
 MicroRNAs in cardiomyocyte hypertrophy  
 T-Cell antigen Receptor (TCR) Signaling Pathway  
 Follicle Stimulating Hormone (FSH) signaling pathway  
 Human Thyroid Stimulating Hormone (TSH) signaling pathway  
 ErbB Signaling Pathway

### MAPK3

AGE/RAGE pathway  
 MET in type 1 papillary renal cell carcinoma  
 Follicle Stimulating Hormone (FSH) signaling pathway  
 IL-3 Signaling Pathway  
 Viral Acute Myocarditis  
 Prion disease pathway  
 RAC1/PAK1/p38/MMP2 Pathway  
 Corticotropin-releasing hormone signaling pathway  
 IL-2 Signaling Pathway  
 Serotonin Receptor 2 and ELK-SRF/GATA4 signaling  
 Non-genomic actions of 1,25 dihydroxyvitamin D3  
 MAPK Signaling Pathway  
 Regulation of toll-like receptor signaling pathway  
 EPO Receptor Signaling  
 T-Cell antigen Receptor (TCR) pathway during Staphylococcus aureus infection  
 Non-small cell lung cancer  
 TNF alpha Signaling Pathway  
 Alzheimers Disease  
 Signaling of Hepatocyte Growth Factor Receptor  
 IL-1 signaling pathway  
 TGF-beta Receptor Signaling  
 Pancreatic adenocarcinoma pathway  
 Structural Pathway of Interleukin 1 (IL-1)  
 Toll-like Receptor Signaling Pathway  
 Thymic Stromal LymphoPoietin (TSLP) Signaling Pathway  
 PDGF Pathway  
 VEGFA-VEGFR2 Signaling Pathway  
 IL-5 Signaling Pathway  
 IL17 signaling pathway  
 T-Cell antigen Receptor (TCR) Signaling Pathway  
 Endometrial cancer  
 IL-7 Signaling Pathway  
 Spinal Cord Injury  
 Kit receptor signaling pathway  
 IL-6 signaling pathway  
 Human Thyroid Stimulating Hormone (TSH) signaling pathway  
 Hepatitis C and Hepatocellular Carcinoma  
 Interleukin-11 Signaling Pathway  
 TGF-B Signaling in Thyroid Cells for Epithelial-Mesenchymal Transition  
 Oncostatin M Signaling Pathway  
 IL-9 Signaling Pathway  
 Chromosomal and microsatellite instability in colorectal cancer  
 TCA Cycle Nutrient Utilization and Invasiveness of Ovarian Cancer  
 Prolactin Signaling Pathway  
 IL-4 Signaling Pathway

|        |                                                                                                                                                                                                                                                                                                                               |
|--------|-------------------------------------------------------------------------------------------------------------------------------------------------------------------------------------------------------------------------------------------------------------------------------------------------------------------------------|
|        | <p>Leptin signaling pathway<br/> RANKL/RANK (Receptor activator of NFkB (ligand)) Signaling Pathway<br/> TNF related weak inducer of apoptosis (TWEAK) Signaling Pathway<br/> Cardiac Hypertrophic Response<br/> Brain-Derived Neurotrophic Factor (BDNF) signaling pathway<br/> MicroRNAs in cardiomyocyte hypertrophy</p>   |
| MAPT   | <p>Copper homeostasis<br/> Alzheimers Disease<br/> IL-5 Signaling Pathway<br/> Regulation of Microtubule Cytoskeleton<br/> Kit receptor signaling pathway<br/> IL-2 Signaling Pathway<br/> MAPK Signaling Pathway<br/> Brain-Derived Neurotrophic Factor (BDNF) signaling pathway<br/> Notch Signaling Pathway</p>            |
| MPO    | <p>Selenium Micronutrient Network<br/> Folate Metabolism<br/> Vitamin B12 Metabolism</p>                                                                                                                                                                                                                                      |
| MSH6   | <p>Retinoblastoma Gene in Cancer<br/> Signaling Pathways in Glioblastoma<br/> Chromosomal and microsatellite instability in colorectal cancer</p>                                                                                                                                                                             |
| NGF    | <p>Brain-Derived Neurotrophic Factor (BDNF) signaling pathway<br/> MAPK Signaling Pathway<br/> Sudden Infant Death Syndrome (SIDS) Susceptibility Pathways</p>                                                                                                                                                                |
| NLRP3  | <p>IL1 and megakaryocytes in obesity<br/> Nucleotide-binding Oligomerization Domain (NOD) pathway</p>                                                                                                                                                                                                                         |
| NOS1   | <p>Folate Metabolism<br/> Amyotrophic lateral sclerosis (ALS)<br/> Viral Acute Myocarditis<br/> Phosphodiesterases in neuronal function<br/> Spinal Cord Injury<br/> Association Between Physico-Chemical Features and Toxicity Associated Pathways</p>                                                                       |
| NOS3   | <p>Leptin signaling pathway<br/> Corticotropin-releasing hormone signaling pathway<br/> NO/cGMP/PKG mediated Neuroprotection</p>                                                                                                                                                                                              |
| PARP1  | <p>Fas Ligand (FasL) pathway and Stress induction of Heat Shock Proteins (HSP) regulation<br/> Corticotropin-releasing hormone signaling pathway<br/> Viral Acute Myocarditis</p>                                                                                                                                             |
| POMC   | <p>Corticotropin-releasing hormone signaling pathway</p>                                                                                                                                                                                                                                                                      |
| PPP3CA | <p>MAPK Signaling Pathway<br/> Amyotrophic lateral sclerosis (ALS)<br/> Alzheimers Disease<br/> Spinal Cord Injury<br/> Physiological and Pathological Hypertrophy of the Heart<br/> MicroRNAs in cardiomyocyte hypertrophy<br/> Cardiac Hypertrophic Response<br/> Energy Metabolism<br/> VEGFA-VEGFR2 Signaling Pathway</p> |
| PPP3CB | <p>MicroRNAs in cardiomyocyte hypertrophy<br/> Alzheimers Disease<br/> Energy Metabolism<br/> Physiological and Pathological Hypertrophy of the Heart<br/> MAPK Signaling Pathway<br/> Amyotrophic lateral sclerosis (ALS)</p>                                                                                                |
| PRNP   | <p>Copper homeostasis</p>                                                                                                                                                                                                                                                                                                     |



|         |                                                                                                                                                                                                                                                                                                                                                                                                                                                                                                                                                                                                                                                                                  |
|---------|----------------------------------------------------------------------------------------------------------------------------------------------------------------------------------------------------------------------------------------------------------------------------------------------------------------------------------------------------------------------------------------------------------------------------------------------------------------------------------------------------------------------------------------------------------------------------------------------------------------------------------------------------------------------------------|
|         | Prion disease pathway                                                                                                                                                                                                                                                                                                                                                                                                                                                                                                                                                                                                                                                            |
| PTCH1   | Tumor suppressor activity of SMARCB1<br>Hedgehog Signaling Pathway<br>Endochondral Ossification                                                                                                                                                                                                                                                                                                                                                                                                                                                                                                                                                                                  |
| PTGS2   | Selenium Micronutrient Network<br>Chromosomal and microsatellite instability in colorectal cancer                                                                                                                                                                                                                                                                                                                                                                                                                                                                                                                                                                                |
| RELA    | Photodynamic therapy-induced NF-kB survival signaling<br>Aryl Hydrocarbon Receptor<br>Pancreatic adenocarcinoma pathway<br>RAC1/PAK1/p38/MMP2 Pathway<br>Folate Metabolism<br>Oncostatin M Signaling Pathway                                                                                                                                                                                                                                                                                                                                                                                                                                                                     |
| RPS6KB1 | Apoptosis-related network due to altered Notch3 in ovarian cancer<br>Follicle Stimulating Hormone (FSH) signaling pathway<br>IL-4 Signaling Pathway<br>IL-5 Signaling Pathway<br>ErbB Signaling Pathway<br>Interleukin-11 Signaling Pathway<br>Brain-Derived Neurotrophic Factor (BDNF) signaling pathway<br>IL-6 signaling pathway<br>IL-2 Signaling Pathway<br>VEGFA-VEGFR2 Signaling Pathway<br>Pancreatic adenocarcinoma pathway<br>Prolactin Signaling Pathway<br>Factors and pathways affecting insulin-like growth factor (IGF1)-Akt signaling<br>Leptin signaling pathway<br>Human Thyroid Stimulating Hormone (TSH) signaling pathway<br>Kit receptor signaling pathway |
| SOD1    | Selenium Micronutrient Network<br>Oxidative Stress<br>Folate Metabolism<br>Amyotrophic lateral sclerosis (ALS)<br>Vitamin B12 Metabolism<br>One carbon metabolism and related pathways<br>Association Between Physico-Chemical Features and Toxicity Associated Pathways<br>Extracellular vesicles in the crosstalk of cardiac cells<br>Copper homeostasis<br>AGE/RAGE pathway<br>Folate Metabolism<br>Vitamin B12 Metabolism<br>Selenium Micronutrient Network<br>Oxidative Stress<br>One carbon metabolism and related pathways<br>DNA Damage Response (only ATM dependent)<br>VEGFA-VEGFR2 Signaling Pathway                                                                  |
| SQSTM1  | Apoptosis-related network due to altered Notch3 in ovarian cancer<br>Senescence and Autophagy in Cancer<br>Brain-Derived Neurotrophic Factor (BDNF) signaling pathway<br>Regulation of toll-like receptor signaling pathway<br>IL-1 signaling pathway<br>RANKL/RANK (Receptor activator of NFkB (ligand)) Signaling Pathway                                                                                                                                                                                                                                                                                                                                                      |
| STAT3   | IL-2 Signaling Pathway<br>Leptin signaling pathway<br>AGE/RAGE pathway<br>Notch Signaling Pathway<br>Physiological and Pathological Hypertrophy of the Heart<br>IL-5 Signaling Pathway<br>Prion disease pathway<br>IL17 signaling pathway                                                                                                                                                                                                                                                                                                                                                                                                                                        |

TCA Cycle Nutrient Utilization and Invasiveness of Ovarian Cancer  
 EPO Receptor Signaling  
 IL-9 Signaling Pathway  
 Regulation of Microtubule Cytoskeleton  
 IL-6 signaling pathway  
 PDGF Pathway  
 TGF-beta Receptor Signaling  
 Prolactin Signaling Pathway  
 Hepatitis C and Hepatocellular Carcinoma  
 IL-3 Signaling Pathway  
 Adipogenesis  
 Extracellular vesicles in the crosstalk of cardiac cells  
 VEGFA-VEGFR2 Signaling Pathway  
 Thymic Stromal LymphoPoietin (TSLP) Signaling Pathway  
 Pancreatic adenocarcinoma pathway  
 IL-7 Signaling Pathway  
 Brain-Derived Neurotrophic Factor (BDNF) signaling pathway  
 Non-small cell lung cancer  
 Oncostatin M Signaling Pathway  
 Interleukin-11 Signaling Pathway  
 IL-4 Signaling Pathway  
 MET in type 1 papillary renal cell carcinoma  
 Signaling of Hepatocyte Growth Factor Receptor  
 Kit receptor signaling pathway  
 Viral Acute Myocarditis  
 MicroRNAs in cardiomyocyte hypertrophy  
 RAC1/PAK1/p38/MMP2 Pathway  
 Human Thyroid Stimulating Hormone (TSH) signaling pathway

**TBK1**

Chromosomal and microsatellite instability in colorectal cancer  
 TLR4 Signaling and Tolerance  
 TNF alpha Signaling Pathway  
 Regulation of toll-like receptor signaling pathway  
 Toll-like Receptor Signaling Pathway  
 RIG-I-like Receptor Signaling

**TFAM**

Energy Metabolism

**TGFB1**

Adipogenesis  
 Lung fibrosis  
 Allograft Rejection  
 TGF-B Signaling in Thyroid Cells for Epithelial-Mesenchymal Transition  
 Chromosomal and microsatellite instability in colorectal cancer  
 Differentiation Pathway  
 T-Cell antigen Receptor (TCR) Signaling Pathway  
 MicroRNAs in cardiomyocyte hypertrophy  
 TGF-beta Receptor Signaling  
 MAPK Signaling Pathway  
 Viral Acute Myocarditis  
 Cardiac Hypertrophic Response  
 Aryl Hydrocarbon Receptor Pathway  
 IL-3 Signaling Pathway  
 Spinal Cord Injury  
 Pancreatic adenocarcinoma pathway  
 Hepatitis C and Hepatocellular Carcinoma  
 Corticotropin-releasing hormone signaling pathway  
 Senescence and Autophagy in Cancer  
 Cytokines and Inflammatory Response  
 Interleukin-11 Signaling Pathway

**TIMP1**

Lung fibrosis  
 IL-6 signaling pathway  
 IL1 and megakaryocytes in obesity

**TNF**

Vitamin B12 Metabolism  
 Amyotrophic lateral sclerosis (ALS)

Photodynamic therapy-induced AP-1 survival signaling.  
 Folate Metabolism  
 Selenium Micronutrient Network  
 Viral Acute Myocarditis  
 Overview of nanoparticle effects  
 Lung fibrosis  
 Apoptosis-related network due to altered Notch3 in ovarian cancer  
 TGF-beta Receptor Signaling  
 TNF related weak inducer of apoptosis (TWEAK) Signaling Pathway  
 Allograft Rejection  
 T-Cell antigen Receptor (TCR) pathway during Staphylococcus aureus infection  
 NO/cGMP/PKG mediated Neuroprotection  
 Fas Ligand (FasL) pathway and Stress induction of Heat Shock Proteins (HSP) regulation  
 Cardiac Hypertrophic Response  
 Photodynamic therapy-induced NF-kB survival signaling  
 Aryl Hydrocarbon Receptor Pathway  
 Alzheimers Disease  
 Spinal Cord Injury  
 Oxidative Damage  
 Apoptosis  
 MicroRNAs in cardiomyocyte hypertrophy  
 Development and heterogeneity of the ILC family  
 RIG-I-like Receptor Signaling  
 Adipogenesis  
 Sudden Infant Death Syndrome (SIDS) Susceptibility Pathways  
 TNF alpha Signaling Pathway  
 Oligodendrocyte Specification and differentiation(including remyelination), leading to Myelin Components for CNS  
 Non-genomic actions of 1,25 dihydroxyvitamin D3  
 Cytokines and Inflammatory Response  
 Toll-like Receptor Signaling Pathway  
 TLR4 Signaling and Tolerance  
 miRNAs in the signaling pathway of the immune response in sepsis  
 EBV LMP1 signaling  
 MAPK Signaling Pathway  
 Regulation of toll-like receptor signaling pathway

#### TP53

Folate Metabolism  
 Photodynamic therapy-induced AP-1 survival signaling.  
 Oncostatin M Signaling Pathway  
 Chromosomal and microsatellite instability in colorectal cancer  
 Endometrial cancer  
 Bladder Cancer  
 miRNAs involved in DNA damage response  
 Signaling Pathways in Glioblastoma  
 DNA Damage Response (only ATM dependent)  
 Pancreatic adenocarcinoma pathway  
 ErbB Signaling Pathway  
 G1 to S cell cycle control  
 DNA Damage Response  
 Retinoblastoma Gene in Cancer  
 RAC1/PAK1/p38/MMP2 Pathway  
 Copper homeostasis  
 Hepatitis C and Hepatocellular Carcinoma  
 Non-small cell lung cancer  
 Amyotrophic lateral sclerosis (ALS)

#### VCAM1

Photodynamic therapy-induced NF-kB survival signaling

#### VEGFA

Endochondral Ossification  
 Photodynamic therapy-induced NF-kB survival signaling  
 Hepatitis C and Hepatocellular Carcinoma  
 Oncostatin M Signaling Pathway  
 Aryl Hydrocarbon Receptor  
 Pancreatic adenocarcinoma pathway  
 Bladder Cancer  
 Allograft Rejection



**Supplementary Table 8.** Ratio of genes affected by formaldehyde (FA) to total genes among all pathways overlapping three or more diseases.

| Pathways                                                        | Formaldehyde Genes <sup>a</sup>                                                                    |  | #  | Pathway Genes <sup>b</sup> | FA/Pathway (%) |
|-----------------------------------------------------------------|----------------------------------------------------------------------------------------------------|--|----|----------------------------|----------------|
|                                                                 | Name                                                                                               |  |    |                            |                |
| Amyotrophic lateral sclerosis (ALS)                             | BAX, BCL2, CASP1, CASP3, CST3, GPX1, MAP3K5, NOS1, PPP3CA, PPP3CB, SOD1, TNF, TP53                 |  | 13 | 38                         | 34%            |
| Overview of nanoparticle effects                                | BAX, BCL2, CXCL8, HMOX1, IL6, TNF                                                                  |  | 6  | 19                         | 32%            |
| Photodynamic therapy-induced NF-κB survival signaling           | CCND1, CXCL8, ICAM1, IL1A, IL1B, IL2, IL6, RELA, TNF, VCAM1, VEGFA                                 |  | 11 | 35                         | 31%            |
| Folate Metabolism                                               | AHCY, GPX1, GPX3, ICAM1, IFNG, IL1B, IL2, IL6, LDLR, MPO, NOS1, RELA, SOD1, SOD2, TNF, TP53        |  | 16 | 70                         | 23%            |
| Oxidative Stress                                                | FOS, GPX1, GPX3, HMOX1, SOD1, SOD2                                                                 |  | 6  | 30                         | 20%            |
| Photodynamic therapy-induced AP-1 survival signaling.           | BAX, BCL2, CCND1, FOS, IFNG, IL2, IL6, MAP3K5, TNF, TP53                                           |  | 10 | 51                         | 20%            |
| Viral Acute Myocarditis                                         | BAX, BCL2, CASP3, CAV1, EDN1, GSK3B, IFNG, IL10, IL6, MAPK1, MAPK3, NOS1, PARP1, STAT3, TGFB1, TNF |  | 16 | 85                         | 19%            |
| Chromosomal and microsatellite instability in colorectal cancer | APC, BAX, BCL2, CASP3, CCND1, FOS, GSK3B, MAPK1, MAPK3, MSH6, PTGS2, TBK1, TGFB1, TP53             |  | 14 | 74                         | 19%            |
| Oncostatin M (OSM) Signaling Pathway (OSM)                      | CASP3, FOS, HRAS, JUND, LDLR, MAPK1, MAPK3, RELA, STAT3, TP53, VEGFA                               |  | 11 | 66                         | 17%            |
| Vitamin B12 Metabolism                                          | ICAM1, IFNG, IL1B, IL6, LDLR, MPO, SOD1, SOD2, TNF                                                 |  | 9  | 53                         | 17%            |
| Copper homeostasis                                              | APC, CASP3, CCND1, GSK3B, MAPT, PRNP, SOD1, TP53                                                   |  | 8  | 54                         | 15%            |
| Lung fibrosis                                                   | CXCL8, EDN1, HMOX1, IL1B, IL6, TGFB1, TIMP1, TNF                                                   |  | 8  | 63                         | 13%            |
| Selenium Micronutrient Network                                  | GPX1, GPX3, IFNG, IL1B, IL6, LDLR, MPO, PTGS2, SOD1, SOD2, TNF                                     |  | 11 | 89                         | 12%            |
| Allograft rejection                                             | CASP3, CD40, CXCL8, IFNG, IL10, IL1A, IL1B, TGFB1, TNF, VEGFA                                      |  | 10 | 90                         | 11%            |

Abbreviations: FA; formaldehyde

<sup>a</sup> Derived from Supplementary Table 7.

<sup>b</sup> Derived from Supplementary Table 6.

**Supplementary Figure 1.** Brain cancer sensitivity analysis: one study excluded at a time using random effects model.

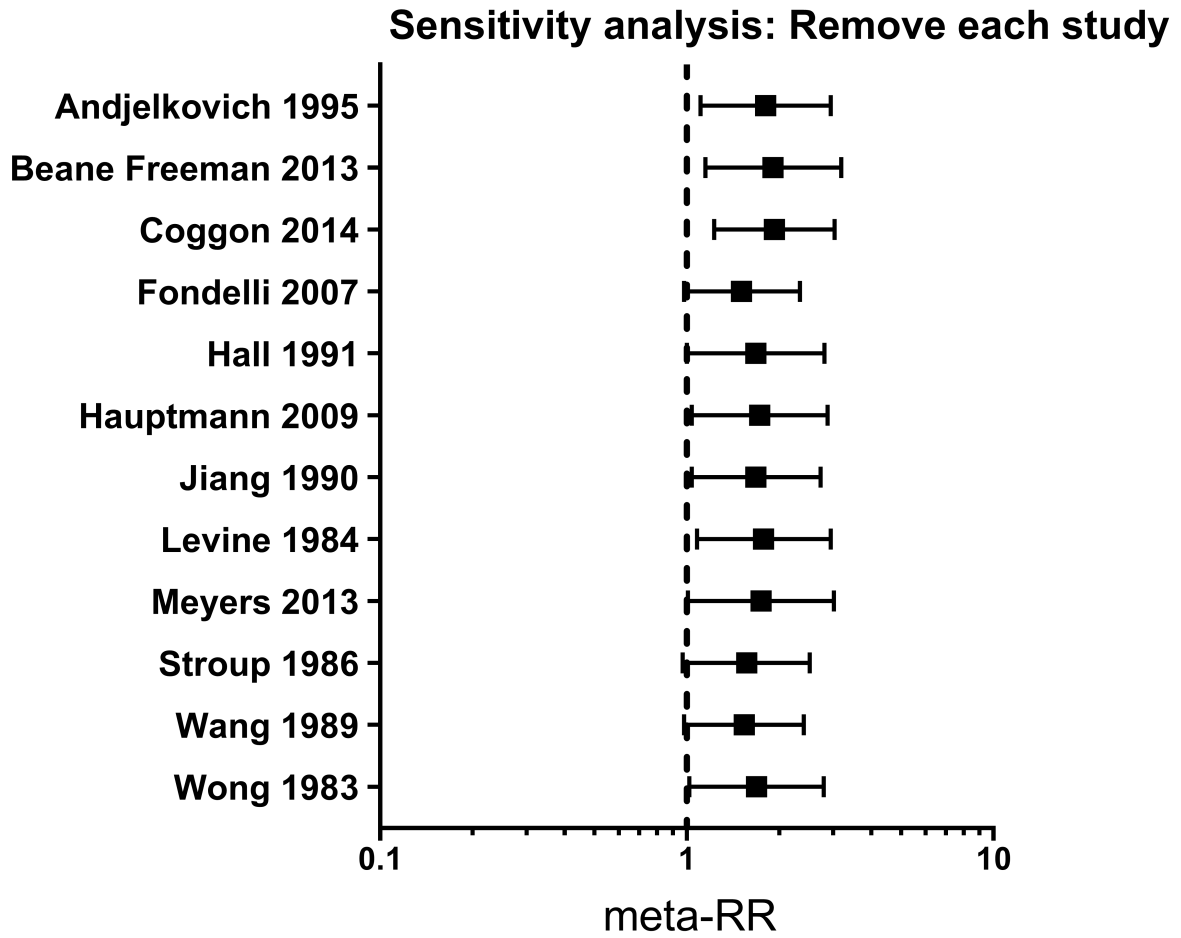

**Supplementary Figure 2.** An integrative network that visualizes the unique and overlapping genes and pathways affected by **AD** (purple nodes), **ALS** (blue nodes), **brain tumor** (orange nodes), **MS** (yellow nodes), **PD** (red nodes). The pathways and genes that were only found when analyzing the other Neurodegenerative Diseases (oNDD) (excluding AD, ALS and PD) are also represented in the network (green nodes). In the middle of the network, the overlapping pathways and genes are visualized between two or more neurodegenerative diseases

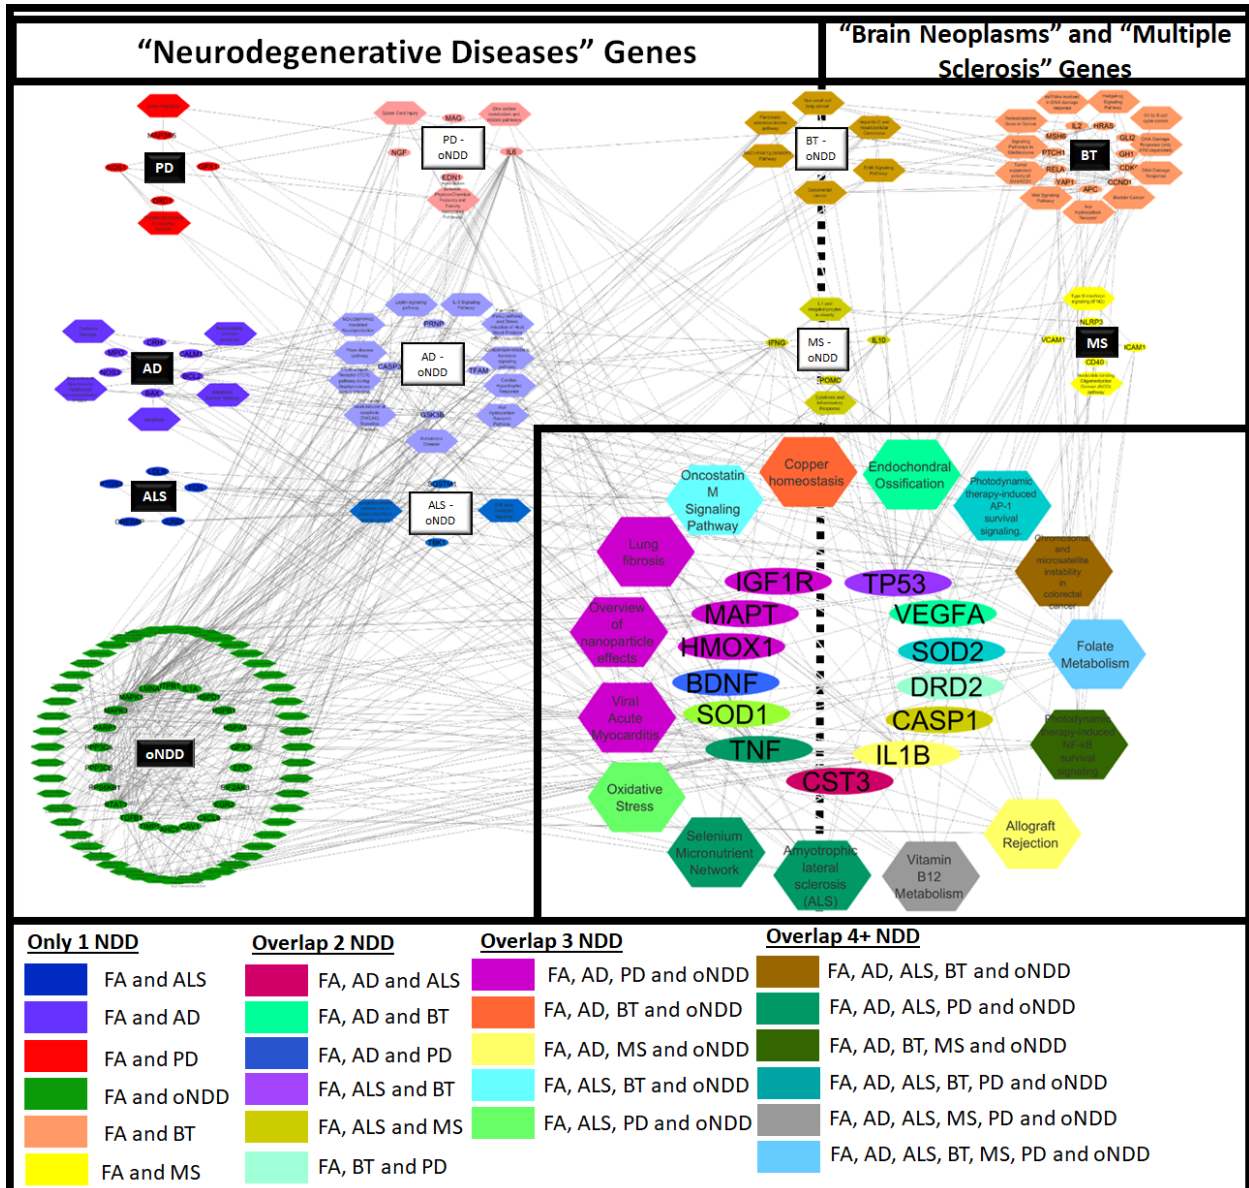

**Supplementary Figure 3. Representation of formaldehyde-affected genes within the Amyotrophic Lateral Sclerosis Pathway.**

Title: Amyotrophic lateral sclerosis (ALS)  
 Organism: Homo sapiens

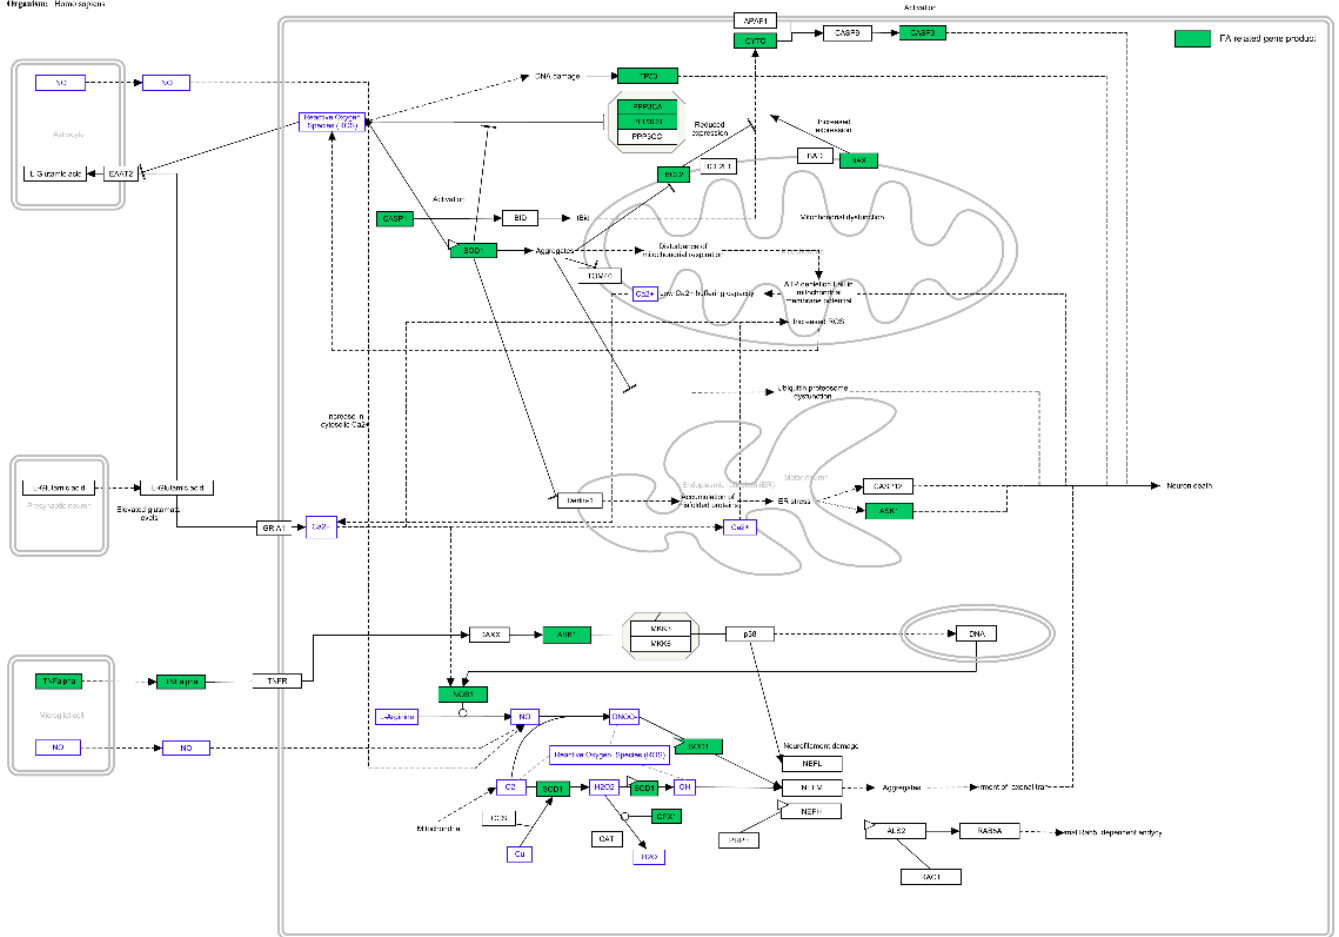

Supplement: NIHMS1655669-supplement-Supplement_11_20_20_LP.pdf [file NIHMS1655669-supplement-Supplement_11_20_20_LP.pdf]
